# Supplementary material for: Controlled aqueous polymerization of acrylamides and acrylates and “in situ” depolymerization in the presence of dissolved CO2
Source: Royal Society of Chemistry journal article supplement (doi:10.1039/c6cc03027k), 2016-01-01
Supplement: c6cc03027k1.pdf [file c6cc03027k1.pdf]

# Electronic Supplementary Information

## for

# Controlled aqueous polymerization of acrylamides and acrylates and “*in-situ*” depolymerization in the presence of dissolved CO<sub>2</sub>

*Danielle J. Lloyd<sup>a</sup>, Vasiliki Nikolaou<sup>a</sup>, Jennifer Collins<sup>a</sup>, Christopher Waldron<sup>a</sup>, Athina Anastasaki<sup>a,b</sup>, Simon P. Bassett<sup>c</sup>, Steven M. Howdle<sup>c</sup>, Adam Blazs<sup>d</sup>, Paul Wilson<sup>a,b</sup>, Kristian Kempe<sup>a,b</sup> and David M. Haddleton<sup>a,b\*</sup>*

<sup>a</sup> *Department of Chemistry, University of Warwick, CV4 7AL, Gibbet Hill, Coventry, United Kingdom.*

<sup>b</sup> *Monash Institute of Pharmaceutical Sciences, Monash University, Parkville, VIC 3052, Australia*

<sup>c</sup> *School of Chemistry, University of Nottingham, Nottingham, NG7 2RD, UK*

<sup>d</sup> *BASF SE, 67056, Ludwigshafen, Germany*

\* Email: [D.M.Haddleton@warwick.ac.uk](mailto:D.M.Haddleton@warwick.ac.uk)

## Experimental Details

### Materials:

*N*-Isopropylacrylamide (NIPAm, Sigma-Aldrich, 97 %), water (HPLC grade, VWR), deionized water (RO grade), hydrochloric acid (HCl, Sigma-Aldrich, 37%), MilliQ water (18.2 MΩcm) and sodium hydrogen carbonate (NaHCO<sub>3</sub>, Fisher Scientific, 99.7 %) were used without further purification. Cuprisorb™ resin was purchased from Seachem. Commercially bought carbonated water (Highland Spring sparkling and Perrier water) was used as received (Table S1).

|             | Highland Spring<br>Carbonated Water | Highland Spring<br>Still Water | Perrier Carbonated<br>Water |
|-------------|-------------------------------------|--------------------------------|-----------------------------|
| Bicarbonate | 150                                 | 150                            | 390                         |
| Calcium     | 40.5                                | 40.5                           | 147.3                       |
| Chloride    | 6.1                                 | 6.1                            | 21.5                        |
| Magnesium   | 10.1                                | 10.1                           | 3.4                         |
| Nitrates    | 3.1                                 | 3.1                            | 4.3                         |
| Potassium   | 0.7                                 | 0.7                            | 0.6                         |
| Sodium      | 5.6                                 | 5.6                            | 9.0                         |
| Sulphates   | 5.3                                 | 5.3                            | 33                          |
| pH          | 4.72                                | 7.8                            | 5.46                        |

**Table S1** Average mineral analysis at the source (mg/L) for Highland Spring carbonated and still water and Perrier water

*N,N,N',N'',N'''*-Pentamethyldiethylenetriamine (PMDETA, Sigma-Aldrich, 99 %) was distilled under reduced pressure (55 °C, 10<sup>-1</sup> mbar), deoxygenated, and stored in an ampule under nitrogen protection at 4 °C prior to use. 2-Hydroxyethyl acrylate (HEA, BASF, 96 %) and *N*-hydroxyethyl acrylamide (HEAm, Sigma-Aldrich, 97 %) were uninhibited using basic alumina prior to use in the polymerizations. 3-Dihydroxypropyl 2-bromo-2-methylpropanoate was synthesized according to

the literature procedure.<sup>1</sup> *N,N,N',N',N'',N''*-Hexamethyl-[tris(aminoethyl)amine] (Me<sub>6</sub>TREN) was synthesized according to the literature procedure<sup>2</sup>, deoxygenated, and stored in an ampule at 4 °C under nitrogen protection. Copper<sup>(I)</sup>bromide (Cu<sup>(I)</sup>Br, Aldrich, > 98 %) was purified according to the method detailed by Keller and Wycoff.<sup>3</sup>

### **Instrument and analysis:**

<sup>1</sup>H NMR spectra were recorded on a Brüker AV-250, DPX-400 and HD-500 spectrometer using deuterated solvents obtained from Sigma-Aldrich. IR spectra were collected on a Brüker VECTOR-22 FT-IR spectrometer using a Golden Gate diamond attenuated reflection cell. GC-FID was performed using a Varian 450 fitted with a FactorFour<sup>TM</sup> capillary column VF-1ms, of 15 m x 0.25 mm I.D. and film thickness 0.25 µm, utilizing methanol as the sample solvent. The oven temperature was programmed as follows: 40 °C (allowed to hold for 1 minute) then increased by 25 °C min<sup>-1</sup> to 200 °C. The injector was operated at 200 °C with the FID at 220 °C and nitrogen was used as the carrier gas at a flow rate of 1 mL min<sup>-1</sup>. Gas chromatography – mass spectrometry (GC-MS) was conducted on a Varian 4000 GC equipped with an ion trap mass spectrometer and a non-polar column (Varian Factor Four VF5, 30 m x 0.25 mm x 0.25 µm) with a splitless injector operated at 325 °C. Size exclusion chromatography (SEC) measurements were performed on an Agilent PL50 equipped with 2 Agilent Polargel L Columns eluting with dimethylformamide containing 0.1 M LiBr as an additive at 50°C. The flow rate was 1 mL min<sup>-1</sup> and detection was achieved using simultaneous refractive index (RI) and UV (λ = 280 nm) detectors. Molecular weights were calculated relative to narrow PMMA standards. All samples were stirred in the presence of Cuprisorb<sup>TM</sup> resin to remove residual copper species, dissolved in the appropriate eluent and filtered through disposable 0.45 µm PTFE filters before analysis. Molecular weight data was analyzed using Agilent GPC software and plotted using OriginPro 8.5. UV-Vis spectra were recorded on an Agilent Technologies Cary 60 UV-Vis in the range of 200 – 1100 nm using a cuvette with a 10 mm optical path length. All pH measurements were conducted using a SevenGo<sup>TM</sup> pH – SG2 meter (Fisher Scientific) equipped with a pH semi-micro tip electrode (Thermo Scientific Orion).

The percentage conversion of NIPAm was calculated *via* <sup>1</sup>H NMR through integration of the vinyl group (5.6 ppm, 1H, d) and integration of the CH(CH<sub>3</sub>)<sub>2</sub> peak (3.9 ppm, 1H, m). The conversion of HEAm was

calculated by  $^1\text{H}$  NMR through integration of the vinyl group (5.65 ppm, 1H, d) and integration of the  $\text{CH}_2\text{NH}$  peak (3.93 ppm, 2H, q). For HEA, the conversion was calculated *via*  $^1\text{H}$  NMR through integration of the vinyl group (6.95 ppm, 1H, d) and integration of the  $\text{CH}_2\text{OH}$  peak (3.75 ppm, 2H, q).

Where referred to, % depolymerization refers to the quantity of polymer which has undergone depolymerization

## **Experimental procedures:**

### **Typical procedure for the polymerization and depolymerization of NIPAm in the presence of $\text{Me}_6\text{TREN}$**

$\text{Me}_6\text{TREN}$  (23.6  $\mu\text{L}$ , 0.4 eq.) was added to a 14 mL glass vial containing Highland Spring carbonated water (3 mL), sealed with a rubber septum and stirred at 250 rpm for 1 minute. The glass vial was then placed into an ice/water bath to regulate the temperature and suppress the rate of hydrolysis.  $\text{Cu}^{\text{II}}\text{Br}$  (12.7 mg, 0.4 eq.) was rapidly added to the ligand-water mix and the vial was re-sealed. Upon addition of  $\text{Cu}^{\text{II}}\text{Br}$  to the ligand-water mix, a coloured solution formed and red/brown  $\text{Cu}^{\text{II}}$  particles were visible. The solution was allowed to stir and disproportionate whilst 3-dihydroxypropyl 2-bromo-2-methylpropanoate (53.3 mg, 1.0 eq.) and NIPAm (500 mg, 20 eq.) were dissolved in Highland Spring carbonated water (2 mL), sealed with a rubber septum, and stirred at 250 rpm for 10 minutes. At the end of this period, the initiator-monomer solution was transferred *via* a syringe and needle into the glass vial containing the disproportionated ligand and  $\text{Cu}^{\text{II}}\text{Br}$ . Samples for NMR and GPC were taken using a syringe, frozen in liquid nitrogen, thawed, and diluted in the appropriate solvents.

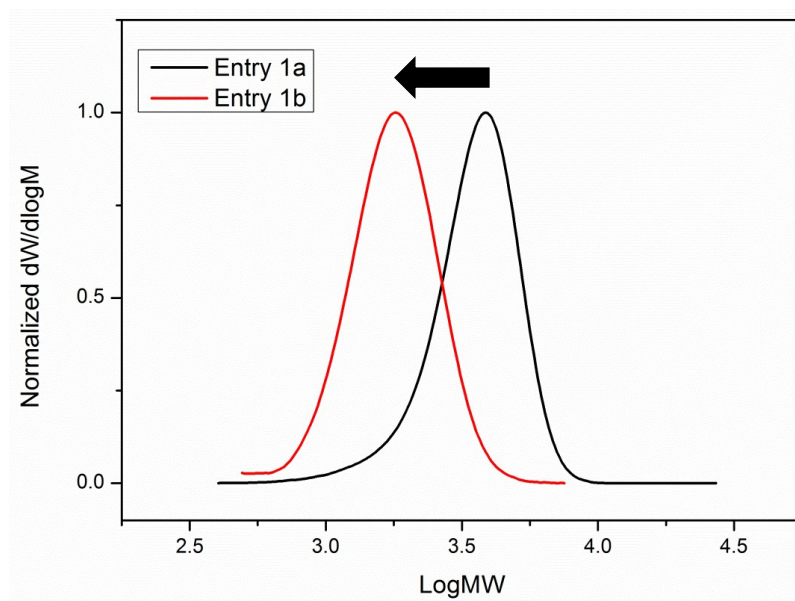

**Fig. S1** Molecular weight distributions for the polymerization (entry 1a, black) and depolymerization (entry 1b, red) of pNIPAm in carbonated water at 0 °C; [NIPAm] : [I] : [Cu<sup>0</sup>Br] : [Me<sub>6</sub>TREN] = [20] : [1] : [0.4] : [0.4].

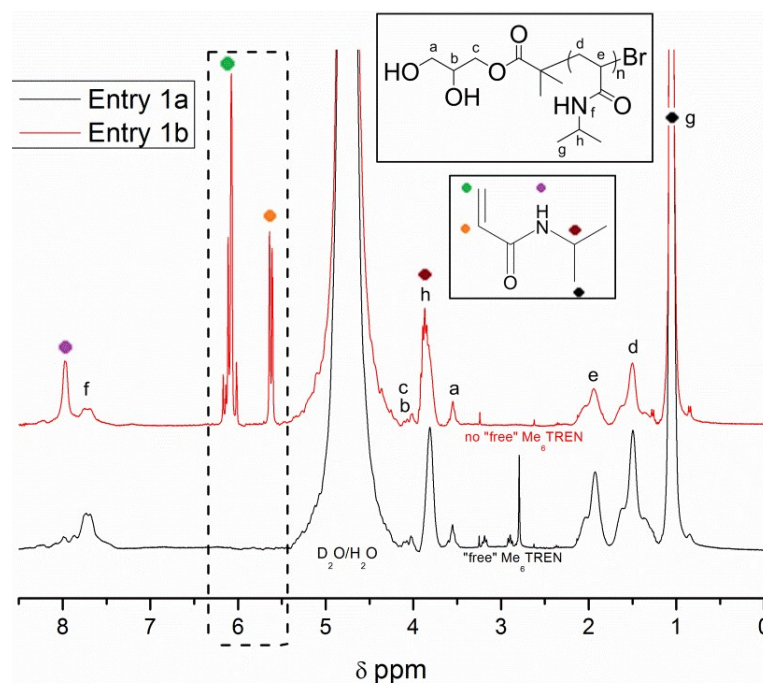

**Fig. S2** <sup>1</sup>H NMR spectra (D<sub>2</sub>O) for the polymerization (entry 1a, black) and depolymerization (entry 1b, red) of pNIPAm in carbonated water at 0 °C; [NIPAm] : [I] : [Cu<sup>0</sup>Br] : [Me<sub>6</sub>TREN] = [20] : [1] : [0.4] : [0.4].

| Code                 | Retention Time (minutes) |
|----------------------|--------------------------|
| NIPAm standard       | 2.76                     |
| Depolymerized pNIPAm | 2.75                     |

**Table S2** Results for the GC analysis of depolymerized pNIPAm (green) and a NIPAm standard (black).

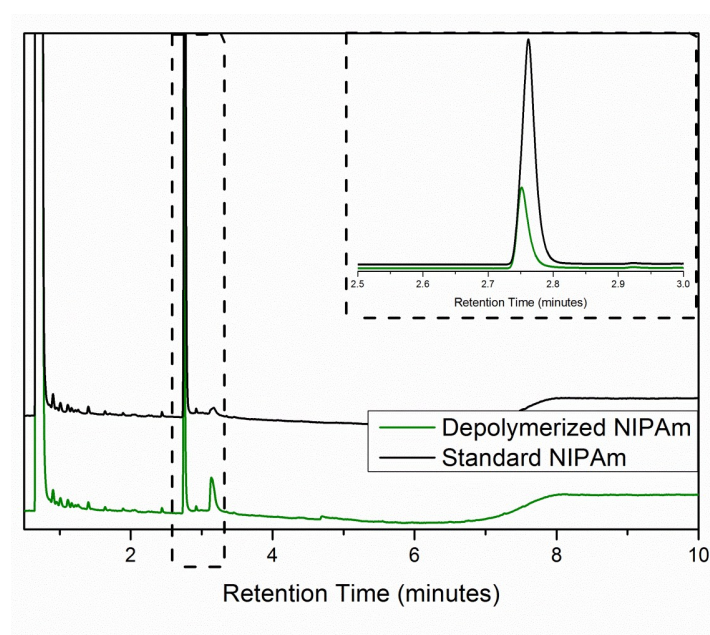

**Fig. S3** GC traces for the reaction mix post-depolymerization (green); [NIPAm] : [I] : [Cu<sup>I</sup>Br] : [Me<sub>6</sub>TREN] = [20] : [1] : [0.4] : [0.4] and standard NIPAm (black) in methanol (MeOH).

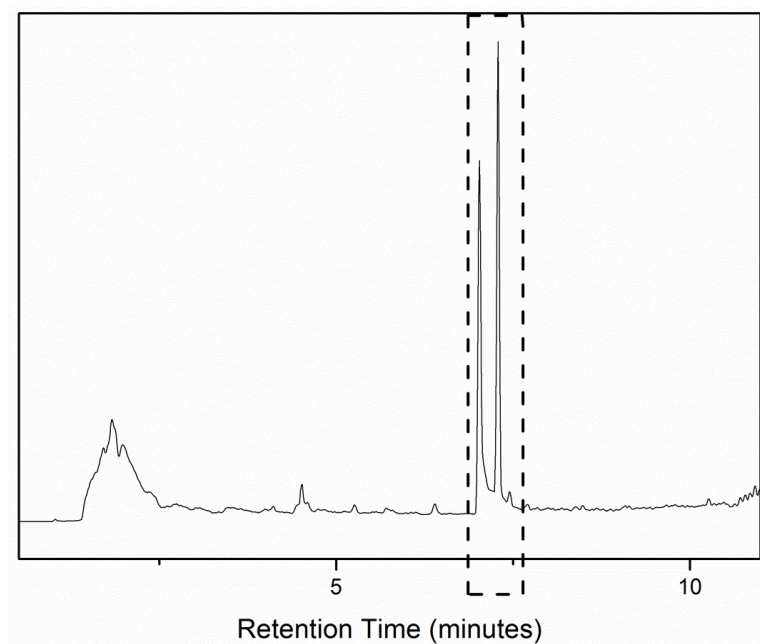

**Fig. S4** GC trace for the depolymerized pNIPAm reaction mix in methanol (MeOH); [NIPAm] : [I] :  
[Cu<sup>(I)</sup>Br] : [Me<sub>6</sub>TREN] = [20] : [1] : [0.4] : [0.4].

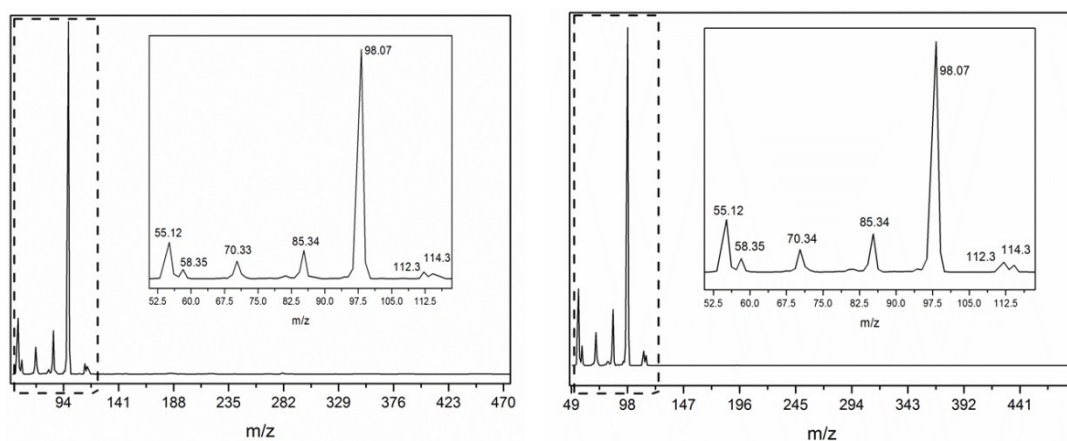

**Fig. S5** Mass spectrum for the depolymerized pNIPAm reaction mix (peak 1, left) (peak 2, right); [NIPAm] : [I] : [Cu<sup>(I)</sup>Br] : [Me<sub>6</sub>TREN] = [20] : [1] : [0.4] : [0.4].

| Fragmentation                                                                       | Theoretical m/z | Peak 1 m/z          | Peak 2 m/z          |
|-------------------------------------------------------------------------------------|-----------------|---------------------|---------------------|
| Structure                                                                           |                 | (rt = 7.02 minutes) | (rt = 7.27 minutes) |
| 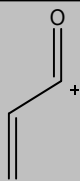   | 55.02           | 55.12               | 55.12               |
|    | 58.10           | 58.35               | 58.35               |
|    | 70.03           | 70.33               | 70.34               |
|  | 85.05           | 85.34               | 85.34               |
|  | 98.06           | 98.07               | 98.07               |
|  | 112.08          | 112.30              | 112.30              |
|  | 114.09          | 114.30*             | 114.30*             |

\*denotes the molecular ion [M+]

**Table S3** GC-MS analysis of the depolymerized pNIPAm reaction mixture.



### Procedure for the repolymerization of pNIPAm following depolymerization

For the repolymerization of depolymerized pNIPAm, the reaction mixture was deoxygenated with N<sub>2</sub> for 15 minutes and left under a nitrogen atmosphere for 30 minutes before analysis *via* SEC and <sup>1</sup>H NMR.

### Typical procedure for the aqueous Cu-mediated RDRP of NIPAm in the presence of Me<sub>6</sub>TREN

To a Schlenk tube equipped with a magnetic stirring bar, HPLC grade water (3 mL) and Me<sub>6</sub>TREN were added and purged of oxygen *via* nitrogen (N<sub>2</sub>) bubbling for 2 minutes. The mixture was placed into an ice/water bath to regulate the temperature (0 °C) after which Cu<sup>(I)</sup>Br was added under an N<sub>2</sub> atmosphere. Upon addition of Cu<sup>(I)</sup>Br to the ligand-water mix, a coloured solution formed and red/brown Cu<sup>(0)</sup> particles were visible. The resulting solution was allowed to stir and disproportionate whilst 3-dihydroxypropyl 2-bromo-2-methylpropanoate and NIPAm were dissolved in water (2 mL) and bubbled with nitrogen for 15 minutes. At the end of the deoxygenation period the initiator-monomer solution was transferred *via* a nitrogen purged syringe and needle into the Schlenk tube. Samples for NMR and GPC were taken using a nitrogen purged syringe, filtered through an alumina column, and diluted in the appropriate solvents.

The amounts and equivalents of the reagents for the polymerizations are provided in Table S4.

| Code    | Targeted<br>DP | Monomer<br>(mg) | Initiator<br>(eq.) | Initiator<br>(mg) | Ligand<br>(eq.) | Ligand<br>(μL) | Cu <sup>(I)</sup> Br<br>(mg) | Cu <sup>(I)</sup> Br<br>(eq.) |
|---------|----------------|-----------------|--------------------|-------------------|-----------------|----------------|------------------------------|-------------------------------|
| Entry 2 | 20             | 500.0           | 1.0                | 53.3              | 0.4             | 23.6           | 0.4                          | 12.7                          |

**Table S4** Conditions used to synthesize pNIPAm in HPLC grade water to a targeted DP = 20 in the presence of Cu<sup>(I)</sup>Br/Me<sub>6</sub>TREN.

| Code    | Targeted | Time      | Conversion | $M_{n,th}$    | $M_{n,GPC}$   | $\bar{D}_m$ |
|---------|----------|-----------|------------|---------------|---------------|-------------|
|         | DP       | (minutes) | (%)        | $g\ mol^{-1}$ | $g\ mol^{-1}$ |             |
| Entry 2 | 20       | 60        | 100        | 2500          | 4300          | 1.09        |

**Table S5**  $^1H$  NMR and SEC results for the synthesis of pNIPAm in HPLC grade water to a targeted DP = 20.

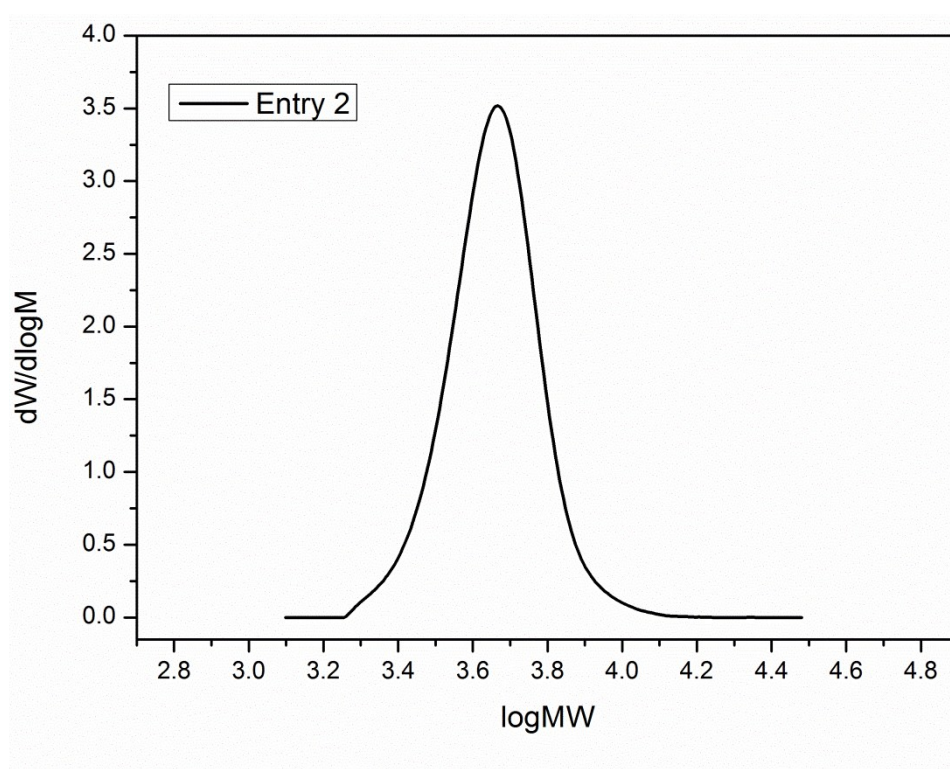

**Fig. S6** Molecular weight distributions for the polymerization of NIPAm in HPLC grade water at 0 °C; [NIPAm] : [I] : [Cu<sup>0</sup>Br] : [Me<sub>6</sub>TREN] = [20] : [1] : [0.4] : [0.4].

**Procedure for the polymerization and depolymerization of pNIPAm conducted in HPLC grade water carbonated with dry ice**

0.5 g of dry ice was charged to a vial containing 20 mL of water (HPLC grade) and sealed with a latex balloon. After complete dissolution of the dry ice pellet, the balloon was removed and the carbonated water used as a solvent for the polymerization of DP20 NIPAm. Me<sub>6</sub>TREN was added to a 14 mL glass vial containing carbonated water (3 mL), sealed with a rubber septum and stirred at 250 rpm for 1 minute. The glass vial was then placed into an ice/water bath to regulate the temperature and suppress the rate of hydrolysis. Cu<sup>(I)</sup>Br was rapidly added to the ligand-water mix and the vial was re-sealed. Upon addition of Cu<sup>(I)</sup>Br to the ligand-water mix, a coloured solution formed and red/brown Cu<sup>(0)</sup> particles were visible. The solution was allowed to stir and disproportionate whilst 3-dihydroxypropyl 2-bromo-2-methylpropanoate and NIPAm were dissolved in carbonated HPLC grade water (2 mL), sealed with a rubber septum, and stirred at 250 rpm for 10 minutes. At the end of this period the initiator-monomer solution was transferred *via* a syringe and needle into the glass vial containing the disproportionated ligand and Cu<sup>(I)</sup>Br. Samples for NMR and GPC were taken using a syringe, frozen in liquid nitrogen, thawed, and diluted in the appropriate solvents.

| Code     | Targeted<br>DP | Time<br>(minutes) | Conversion<br>(%) | Depolymerization<br>(%) | M <sub>n,th</sub><br>g mol <sup>-1</sup> | M <sub>n,GPC</sub><br>g mol <sup>-1</sup> | Đ <sub>m</sub> |
|----------|----------------|-------------------|-------------------|-------------------------|------------------------------------------|-------------------------------------------|----------------|
| Entry 3a | 20             | 10                | 94                | -                       | 2400                                     | 3600                                      | 1.16           |
| Entry 3b | 20             | next day          | 60                | 34                      | 1500                                     | 2800                                      | 1.12           |

**Table S6** <sup>1</sup>H NMR and SEC results for the polymerization (entry 3a) and depolymerization (entry 3b) of pNIPAm in water carbonated using dry ice as the source of carbonation.

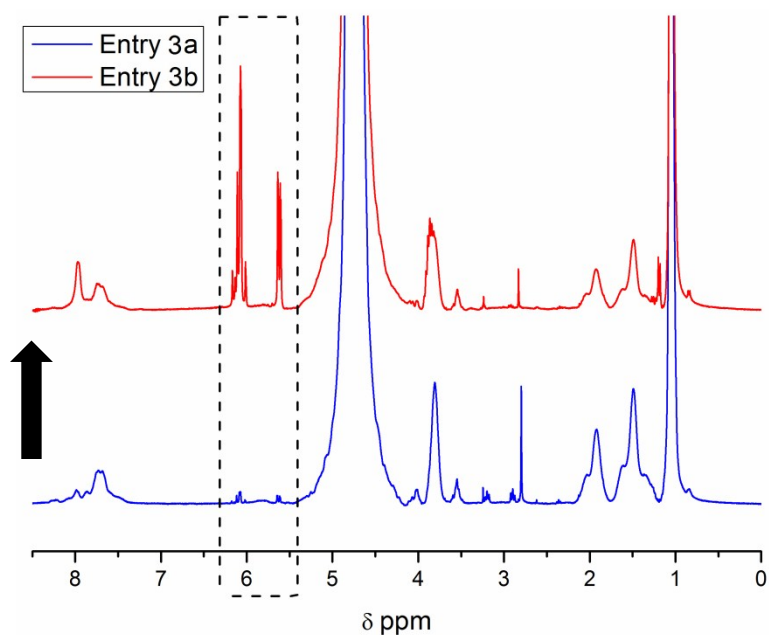

**Fig. S7**  $^1\text{H}$  NMR spectra ( $\text{D}_2\text{O}$ ) for the polymerization (entry 3a, blue) and depolymerization (entry 3b, red) of pNIPAm in carbonated water at  $0^\circ\text{C}$  using dry ice as the source of carbonation;  $[\text{NIPAm}] : [\text{I}] : [\text{Cu}^{\text{II}}\text{Br}] : [\text{Me}_6\text{TREN}] = [20] : [1] : [0.4] : [0.4]$ .

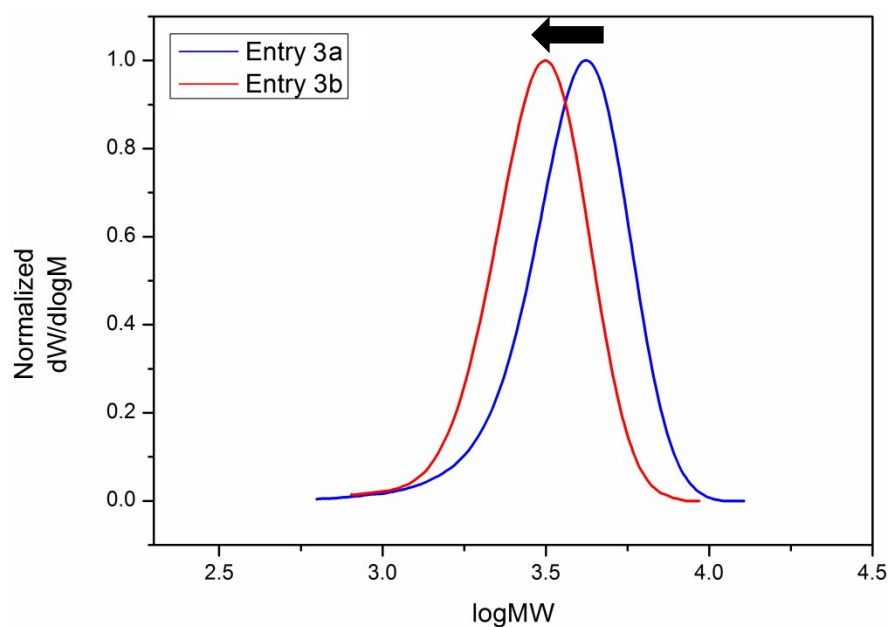

**Fig. S8** Molecular weight distributions for the polymerization (entry 3a, blue) and depolymerization (entry 3b, red) of pNIPAm in carbonated water at  $0^\circ\text{C}$  using dry ice as the source of carbonation;  $[\text{NIPAm}] : [\text{I}] : [\text{Cu}^{\text{II}}\text{Br}] : [\text{Me}_6\text{TREN}] = [20] : [1] : [0.4] : [0.4]$ .

### Procedure for the polymerization of pNIPAm conducted in decarbonated carbonated water

20 mL of Highland Spring sparkling water was subjected to three rigorous freeze-thaw cycles, followed by 30 minutes of sonication to ensure that complete removal of CO<sub>2</sub> had been achieved. Me<sub>6</sub>TREN was added to a 14 mL glass vial containing decarbonated water (3 mL), sealed with a rubber septum and stirred at 250 rpm for 1 minute. The glass vial was then placed into an ice/water bath to regulate the temperature and suppress the rate of hydrolysis. Cu<sup>(I)</sup>Br was rapidly added to the ligand-water mix, the vial re-sealed and deoxygenated with N<sub>2</sub> for 10 minutes. Upon addition of Cu<sup>(I)</sup>Br to the ligand-water mix, a coloured solution formed and red/brown Cu<sup>(0)</sup> particles were visible. The solution was allowed to stir and disproportionate whilst 3-dihydroxypropyl 2-bromo-2-methylpropanoate and NIPAm were dissolved in decarbonated water (2 mL), sealed with a rubber septum, and stirred at 250 rpm for 10 minutes. At the end of this period, the initiator-monomer solution was transferred *via* a syringe and needle into the glass vial containing the disproportionated ligand and Cu<sup>(I)</sup>Br. Samples for NMR and GPC were taken using a syringe, frozen in liquid nitrogen, thawed, and diluted in the appropriate solvents.

| Code    | Targeted<br>DP | Time<br>(minutes) | Conversion<br>(%) | Depolymerization<br>(%) | M <sub>n,th</sub><br>g mol <sup>-1</sup> | M <sub>n,GPC</sub><br>g mol <sup>-1</sup> | Đ <sub>m</sub> |
|---------|----------------|-------------------|-------------------|-------------------------|------------------------------------------|-------------------------------------------|----------------|
| Entry 4 | 20             | 10                | 100               | -                       | 2500                                     | 5300                                      | 1.10           |

**Table S7** <sup>1</sup>H NMR and SEC results for the polymerization of DP = 20 pNIPAm in the presence of Cu<sup>(I)</sup>Br/Me<sub>6</sub>TREN in decarbonated commercial water.

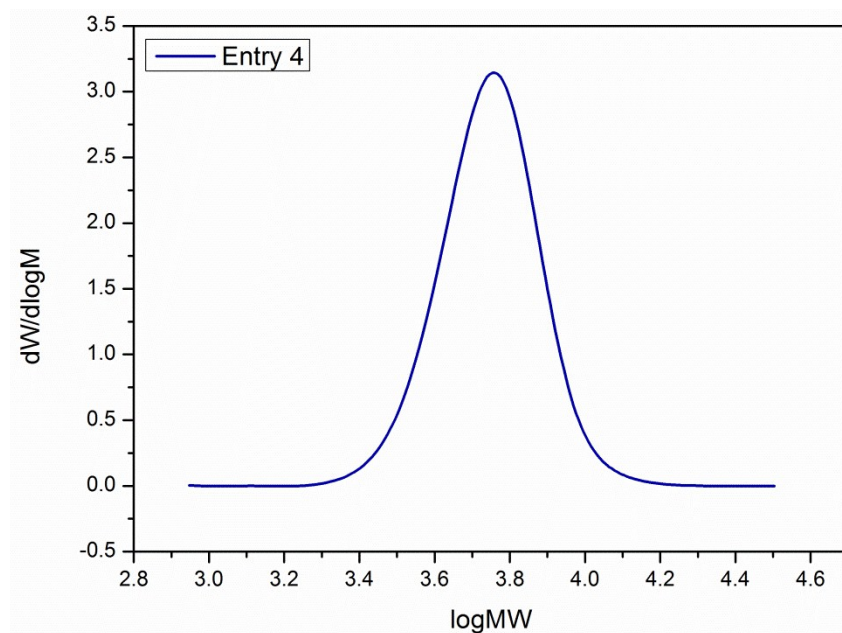

**Fig. S9** Molecular weight distributions for the polymerization of NIPAm in decarbonated commercial water at 0 °C; [NIPAm] : [I] : [Cu<sup>I</sup>Br] : [Me<sub>6</sub>TREN] = [20] : [1] : [0.4] : [0.4].

#### **Typical procedure for the high pressure polymerization DP = 20 NIPAm in carbonated water**

Cu<sup>I</sup>Br (12.7 mg, 0.4 eq.), Me<sub>6</sub>TREN (23.6 μL, 0.4 eq.) and deionized water (3 mL) were charged to a high-pressure steel autoclave. The vessel was partially sealed and placed into an ice/water bath. The resulting catalytic solution was subsequently degassed *via* CO<sub>2</sub> purging at 2 bar for 10 minutes. During this time, deionized water (2 mL), NIPAm (500 mg, 20.0 eq.), and 3-dihydroxypropyl 2-bromo-2-methylpropanoate (53.3 mg, 1.0 eq.) were degassed in a sealed vial with carbon dioxide. After 10 minutes the monomer-initiator solution was transferred *via* a degassed syringe to the autoclave. At this point, the vessel was fully sealed and a range of pressures (10 bar, 24 bar, 48 bar and 100 bar) were applied. The reaction mixture was then stirred at 250 rpm for 10 minutes after which the reaction was terminated by freezing the solution in an acetone/dry ice bath. When completely frozen, the pressure was reduced by venting the autoclave over a period of ~ 30 minutes and a sample was removed and thawed. The reaction was repeated with the polymerization being left

for 1 hour before termination. All samples were diluted in an appropriate solvent and analyzed using NMR and GPC.

| Code     | Pressure<br>(bar) | Time<br>(minutes) | Conversion<br>(%) | Depolymerization<br>(%) | $M_{n,th}$<br>g mol <sup>-1</sup> | $M_{n,GPC}$<br>g mol <sup>-1</sup> | $\bar{D}_m$ |
|----------|-------------------|-------------------|-------------------|-------------------------|-----------------------------------|------------------------------------|-------------|
| Entry 5a | 10                | 10                | 100               | -                       | 2500                              | 3600                               | 2.85        |
| Entry 5b | 10                | 60                | 100               | -                       | 2500                              | 3300                               | 1.89        |
| Entry 6a | 100               | 10                | 98                | -                       | 2500                              | 6200                               | 4.74        |
| Entry 6b | 100               | 60                | 100               | -                       | 2500                              | 3400                               | 1.91        |

**Table S8** <sup>1</sup>H NMR and SEC results for the polymerization of NIPAm in carbonated water under high pressure.

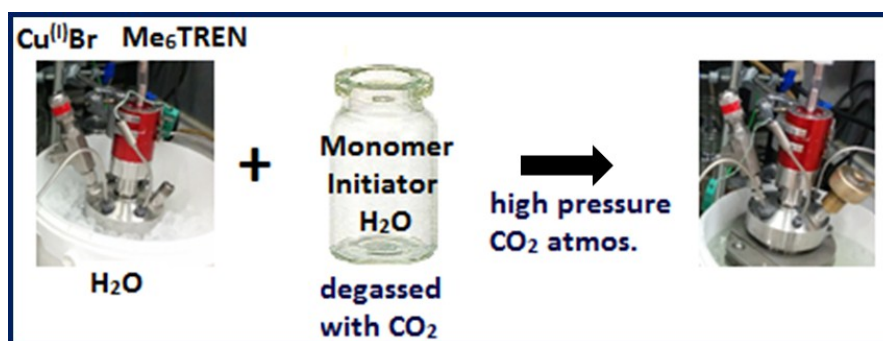

**Scheme S1** General scheme for the polymerization of pNIPAm in carbonated water under high pressure.



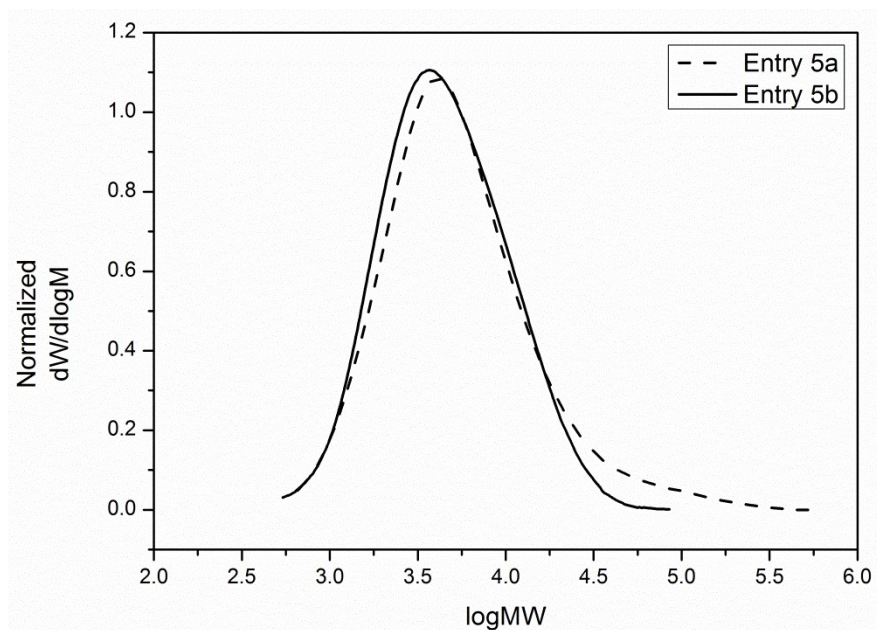

**Fig. S10** Molecular weight distributions for the polymerization of NIPAm in carbonated deionized water at 0 °C under a pressure of 10 bar; [NIPAm] : [I] : [Cu<sup>0</sup>Br] : [Me<sub>6</sub>TREN] = [20] : [1] : [0.4] : [0.4].

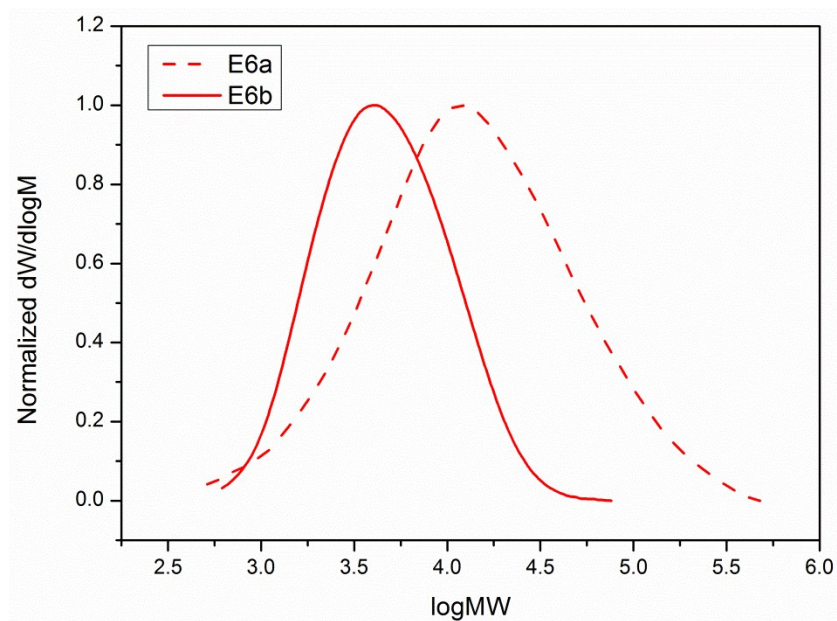

**Fig. S11** Molecular weight distributions for the polymerization of NIPAm in carbonated deionized water at 0 °C under a pressure of 100 bar; [NIPAm] : [I] : [Cu<sup>0</sup>Br] : [Me<sub>6</sub>TREN] = [20] : [1] : [0.4] : [0.4].



### Procedure for the open top polymerization of DP = 20 NIPAm in carbonated water

Me<sub>6</sub>TREN (23.6  $\mu$ L, 0.4 eq.) was added to a 14 mL glass vial containing Highland Spring carbonated water (3 mL), left unsealed and stirred at 250 rpm for 1 minute. The glass vial was then placed into an ice/water bath to regulate the temperature and suppress the rate of hydrolysis. Cu<sup>(0)</sup>Br (12.7 mg, 0.4 eq.) was rapidly added to the ligand-water mix. Upon addition of Cu<sup>(0)</sup>Br to the ligand-water mix, a coloured solution formed and red/brown Cu<sup>(0)</sup> particles were visible. The solution was allowed to stir and disproportionate whilst 3-dihydroxypropyl 2-bromo-2-methylpropanoate (53.3 mg, 1.0 eq.) and NIPAm (500 mg, 20.0 eq.) were dissolved in Highland Spring carbonated water (2 mL), left unsealed, and stirred at 250 rpm for 10 minutes. At the end of this period the initiator-monomer solution was transferred *via* a syringe and needle into the glass vial containing the disproportionated ligand and Cu<sup>(0)</sup>Br. Samples for NMR and GPC were taken using a syringe, frozen in liquid nitrogen, thawed, and diluted in the appropriate solvents.

| Code     | Targeted<br>DP | Time<br>(minutes) | Conversion<br>(%) | Depolymerization<br>(%) | M <sub>n,th</sub><br>g mol <sup>-1</sup> | M <sub>n,GPC</sub><br>g mol <sup>-1</sup> | $\bar{D}_m$ |
|----------|----------------|-------------------|-------------------|-------------------------|------------------------------------------|-------------------------------------------|-------------|
| Entry 7a | 20             | 10                | 99                | -                       | 2500                                     | 4200                                      | 2.25        |
| Entry 7b | 20             | 60                | 98                | -                       | -                                        | -                                         | -           |

**Table S9** <sup>1</sup>H NMR and SEC results for the open top polymerization of NIPAm in carbonated water.

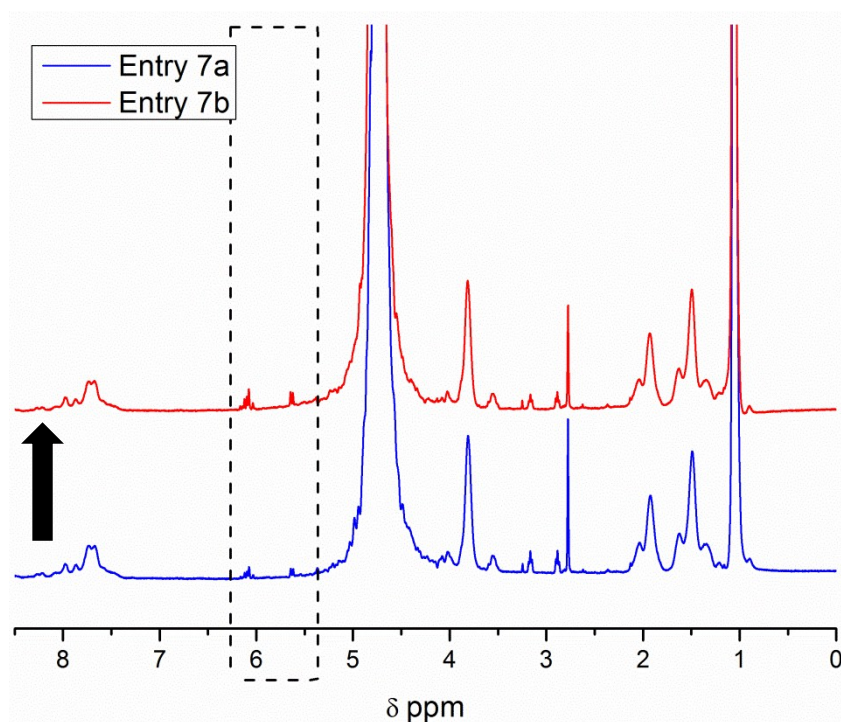

**Fig. S12**  $^1\text{H}$  NMR spectra ( $\text{D}_2\text{O}$ ) for the “open top” polymerization (entry 7a, blue) and depolymerization (entry 7b, red) of pNIPAm in carbonated water at 0 °C;  $[\text{NIPAm}] : [\text{I}] : [\text{Cu}^{\text{II}}\text{Br}] : [\text{Me}_6\text{TREN}] = [20] : [1] : [0.4] : [0.4]$ .

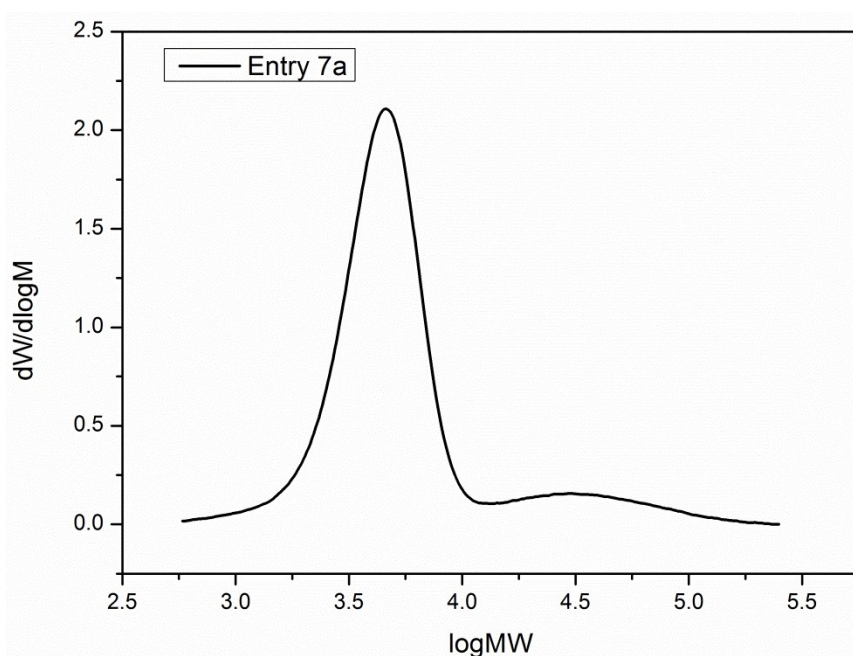

**Fig. S13** Molecular weight distribution for the “open top” polymerization of pNIPAm in carbonated water at 0 °C;  $[\text{NIPAm}] : [\text{I}] : [\text{Cu}^{\text{II}}\text{Br}] : [\text{Me}_6\text{TREN}] = [20] : [1] : [0.4] : [0.4]$ .

### pH monitoring of the polymerization and depolymerization process

Me<sub>6</sub>TREN (11.8  $\mu$ L, 0.4 eq.) was added to a 14 mL glass vial containing Highland Spring carbonated water (3 mL), sealed with a rubber septum and stirred at 250 rpm for 1 minute. The glass vial was then placed into an ice/water bath to regulate the temperature and suppress the rate of hydrolysis. Cu<sup>(0)</sup>Br (6.3 mg, 0.4 eq.) was rapidly added to the ligand-water mix and the vial was re-sealed. Upon addition of Cu<sup>(0)</sup>Br to the ligand-water mix, a coloured solution formed and red/brown Cu<sup>(0)</sup> particles were visible. The solution was allowed to stir and disproportionate whilst 3-dihydroxypropyl 2-bromo-2-methylpropanoate (26.6 mg, 1.0 eq.) and NIPAm (500 mg, 40 eq.) were dissolved in Highland Spring carbonated water (2 mL), sealed with a rubber septum, and stirred at 250 rpm for 10 minutes. At the end of this period the initiator-monomer solution was transferred *via* a syringe and needle into the glass vial containing the disproportionated ligand and Cu<sup>(0)</sup>Br. Samples for NMR and GPC were taken using a syringe, frozen in liquid nitrogen, thawed, and diluted in the appropriate solvents. The pH of the reaction mix was monitored immediately upon sampling of the reaction with all samples being frozen and thawed for NMR following the measurements.

| Code     | Time<br>(minutes) | pH   | Conversion<br>(%) | Depolymerization<br>(%) | M <sub>n,th</sub><br>g mol <sup>-1</sup> | M <sub>n,GPC</sub><br>g mol <sup>-1</sup> | D <sub>m</sub> |
|----------|-------------------|------|-------------------|-------------------------|------------------------------------------|-------------------------------------------|----------------|
| Entry 8a | 1                 | 6.40 | 99                | -                       | 4700                                     | 4700                                      | 1.52           |
| Entry 8b | 5                 | 6.48 | 94                | -                       | 4500                                     | 5900                                      | 1.29           |
| Entry 8c | 10                | 6.53 | 98                | -                       | 4700                                     | 6300                                      | 1.24           |
| Entry 8d | 30                | 6.94 | 35                | 65                      | 1700                                     | 2700                                      | 1.35           |

**Table S10** <sup>1</sup>H NMR and SEC results for the polymerization/depolymerization of DP = 40 pNIPAm in carbonated water with pH measurements recorded for each sample.

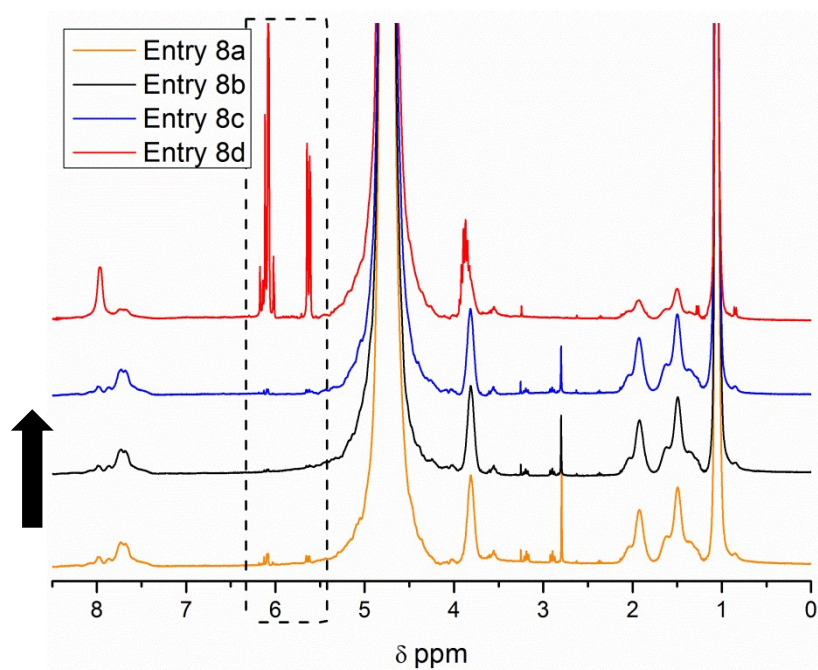

**Fig. S14**  $^1\text{H}$  NMR spectra ( $\text{D}_2\text{O}$ ) for the polymerization (entries 8a-c) and depolymerization (entry 8d) of pNIPAm in carbonated water at  $0\text{ }^\circ\text{C}$ ;  $[\text{NIPAm}] : [\text{I}] : [\text{Cu}^{\text{I}}\text{Br}] : [\text{Me}_6\text{TREN}] = [40] : [1] : [0.4] : [0.4]$ .

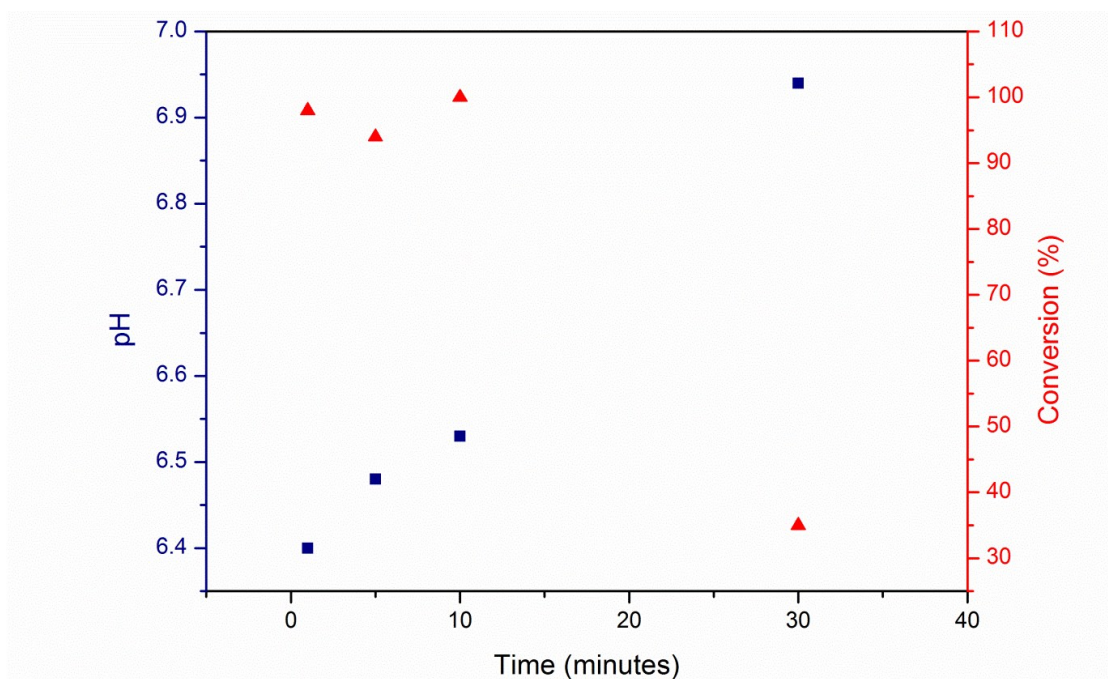

**Fig. S15** Plot of pH vs time (blue) and conversion vs time (red) for the polymerization and depolymerization of DP = 40 pNIPAm.

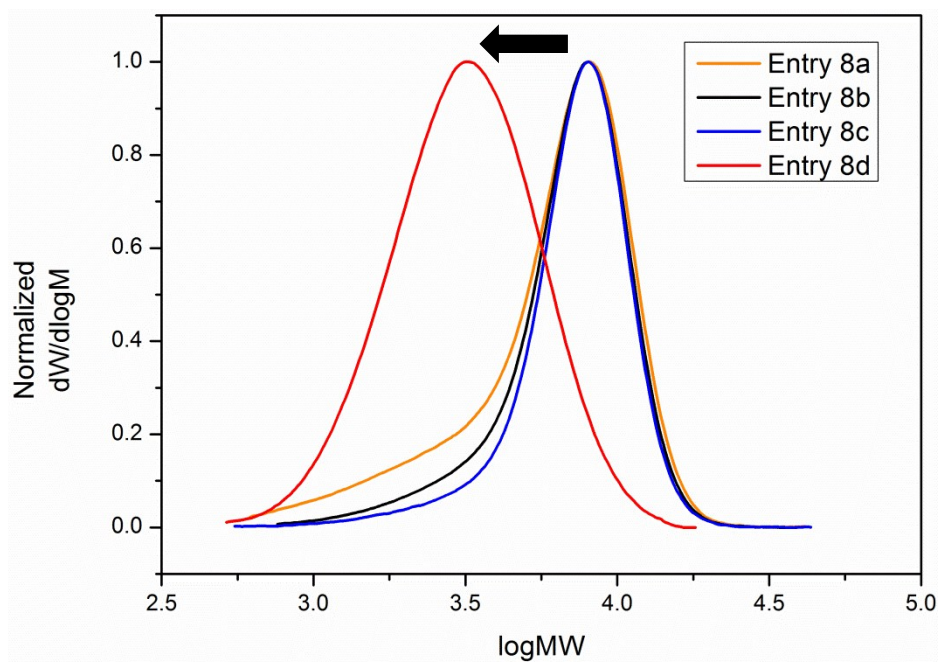

**Fig. S16** Molecular weight distributions for the polymerization (entry 8a-c) and depolymerization (entry 8d) of pNIPAm in carbonated water at 0 °C; [NIPAm] : [I] : [Cu<sup>I</sup>Br] : [Me<sub>6</sub>TREN] = [40] : [1] : [0.4] : [0.4].

#### Supplementary equations for the dissolution of carbon dioxide in water (Eq. S1 - 4)

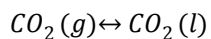

Dissolution of carbon dioxide (**Equation 1**)

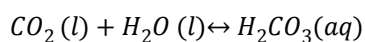

Equilibrium between dissolved carbon dioxide and water (**Equation 2**)

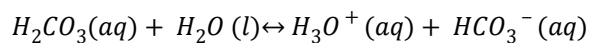

Dissociation of carbonic acid (**Equation 3**)

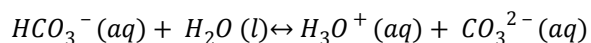

Dissociation of carbonic acid (**Equation 4**)

## Procedure for the aqueous Cu-mediated RDRP of NIPAm in the presence of Me<sub>6</sub>TREN at pH 5.55

To a Schlenk tube equipped with a magnetic stirring bar, acidified HPLC grade water (3 mL) and Me<sub>6</sub>TREN were added and purged of oxygen *via* nitrogen (N<sub>2</sub>) bubbling for 2 minutes. The mixture was placed in an ice/water bath to regulate the temperature (0 °C) after which Cu<sup>(I)</sup>Br was added under an N<sub>2</sub> atmosphere. Upon addition of Cu<sup>(I)</sup>Br to the ligand-water mix, a coloured solution formed and red/brown Cu<sup>(0)</sup> particles were visible. The resulting solution was allowed to stir and disproportionate whilst 3-dihydroxypropyl 2-bromo-2-methylpropanoate and NIPAm were dissolved in acidified water (2 mL) and bubbled with nitrogen for 15 minutes. At the end of the deoxygenation period, the initiator-monomer solution was transferred *via* a nitrogen purged syringe and needle into the Schlenk tube. Samples for NMR and GPC were taken using a nitrogen purged syringe, filtered through an alumina column, and diluted in the appropriate solvents.

The amounts and equivalents of the reagents for the polymerizations are provided in Table S11.

| Code    | Targeted<br>DP | Monomer<br>(mg) | Initiator<br>(eq.) | Initiator<br>(mg) | Ligand<br>(eq.) | Ligand<br>(μL) | Cu <sup>(I)</sup> Br<br>(mg) | Cu <sup>(I)</sup> Br<br>(eq.) |
|---------|----------------|-----------------|--------------------|-------------------|-----------------|----------------|------------------------------|-------------------------------|
| Entry 9 | 20             | 500.0           | 1.0                | 53.3              | 0.4             | 23.6           | 0.4                          | 12.7                          |

**Table S11** Conditions used to synthesize pNIPAm in acidified HPLC grade water to a targeted DP = 20 in the presence of Cu<sup>(I)</sup>Br/Me<sub>6</sub>TREN and carbonated water.



| Code     | Targeted<br>DP | Time<br>(minutes) | Conversion<br>(%) | Depolymerization<br>(%) | $M_{n,th}$<br>g mol <sup>-1</sup> | $M_{n,GPC}$<br>g mol <sup>-1</sup> | $\bar{D}_m$ |
|----------|----------------|-------------------|-------------------|-------------------------|-----------------------------------|------------------------------------|-------------|
| Entry 9a | 20             | 10                | 33                | -                       | 800                               | 1400                               | 1.53        |
| Entry 9b | 20             | 30                | 39                | -                       | 1000                              | 1900                               | 1.47        |
| Entry 9c | 20             | next day          | 73                | -                       | 1800                              | 1600                               | 1.25        |

**Table S12** <sup>1</sup>H NMR and SEC results for the polymerization of NIPAm in acidified HPLC grade water (pH 5.55).

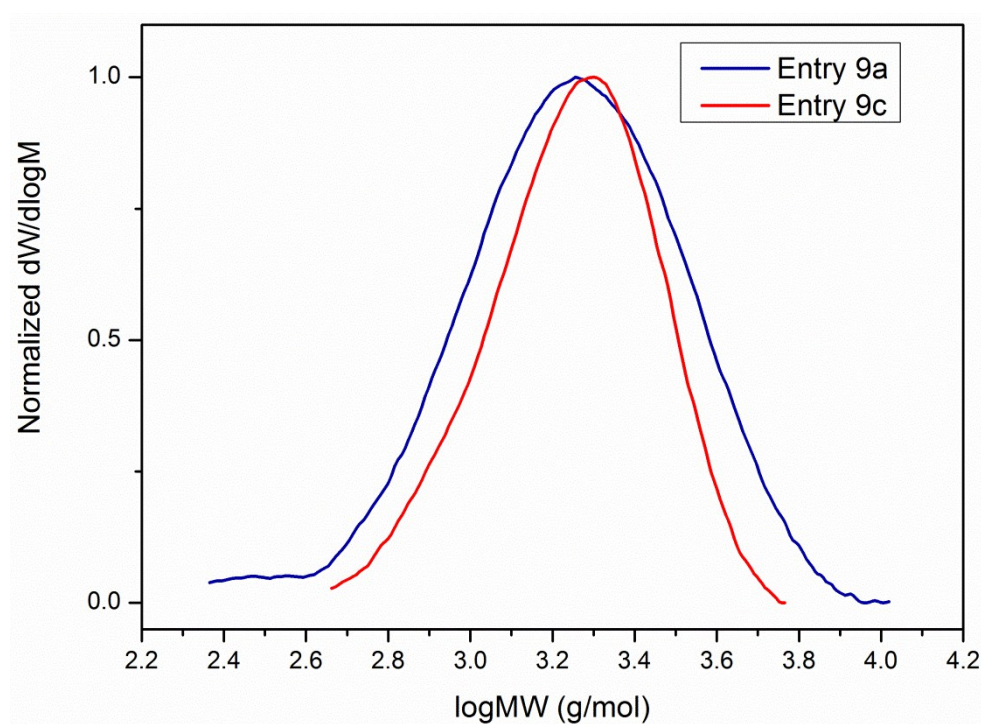

**Fig. S17** Molecular weight distributions for the polymerization of pNIPAm in acidified HPLC grade water (pH 5.55) at 0 °C; [NIPAm] : [I] : [Cu<sup>(I)</sup>Br] : [Me<sub>6</sub>TREN] = [20] : [1] : [0.4] : [0.4].

**Procedure for the polymerization and depolymerization of DP = 20 NIPAm in the presence of Me<sub>6</sub>TREN at pH 8**

Me<sub>6</sub>TREN was added to a 14 mL glass vial containing Highland Spring carbonated water (3 mL), the pH adjusted to 8 with NaHCO<sub>3</sub>, and sealed with a rubber septum. The glass vial was then placed into an ice/water bath to regulate the temperature and suppress the rate of hydrolysis. Cu<sup>(I)</sup>Br was rapidly added to the ligand-water mix, the vial was re-sealed and the resulting solution stirred at 250 rpm for 1 minute. Upon addition of Cu<sup>(I)</sup>Br to the ligand-water mix, a coloured solution formed and red/brown Cu<sup>(0)</sup> particles were visible. The solution was allowed to stir and disproportionate whilst 3-dihydroxypropyl 2-bromo-2-methylpropanoate and NIPAm were dissolved in Highland Spring carbonated water (2 mL), the pH adjusted to 8 with NaHCO<sub>3</sub>, and sealed with a rubber septum. The resulting solution was stirred at 250 rpm for 10 minutes. At the end of this period the initiator-monomer solution was transferred *via* a syringe and needle into the glass vial containing the disproportionated ligand and Cu<sup>(I)</sup>Br. Samples for NMR and GPC were taken using a syringe, frozen in liquid nitrogen, thawed, and diluted in the appropriate solvents.

| Code         | Targeted<br>DP | Time<br>(minutes) | Conversion<br>(%) | Depolymerization<br>(%) | M <sub>n,th</sub><br>g mol <sup>-1</sup> | M <sub>n,GPC</sub><br>g mol <sup>-1</sup> | Đ <sub>m</sub> |
|--------------|----------------|-------------------|-------------------|-------------------------|------------------------------------------|-------------------------------------------|----------------|
| Entry<br>10a | 20             | 10                | 100               | -                       | 2500                                     | 3500                                      | 1.23           |
| Entry<br>10b | 20             | 60                | 100               | -                       | 2500                                     | 3700                                      | 1.17           |
| Entry<br>10c | 20             | next day          | 97                | -                       | 2500                                     | -                                         | -              |



**Table S13**  $^1\text{H}$  NMR and SEC results for the polymerization of NIPAm conducted in pH 8 carbonated water.

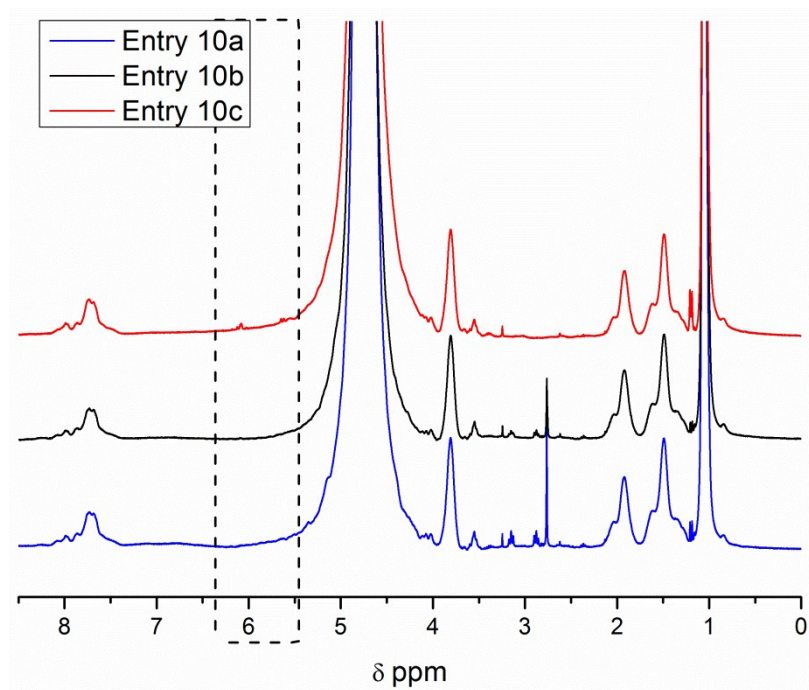

**Fig. S18**  $^1\text{H}$  NMR spectra ( $\text{D}_2\text{O}$ ) for the polymerization at 0 °C of pNIPAm in carbonated water adjusted to pH 8 using  $\text{NaHCO}_3$ ;  $[\text{NIPAm}] : [\text{I}] : [\text{Cu}^{\text{I}}\text{Br}] : [\text{Me}_6\text{TREN}] = [20] : [1] : [0.4] : [0.4]$ .

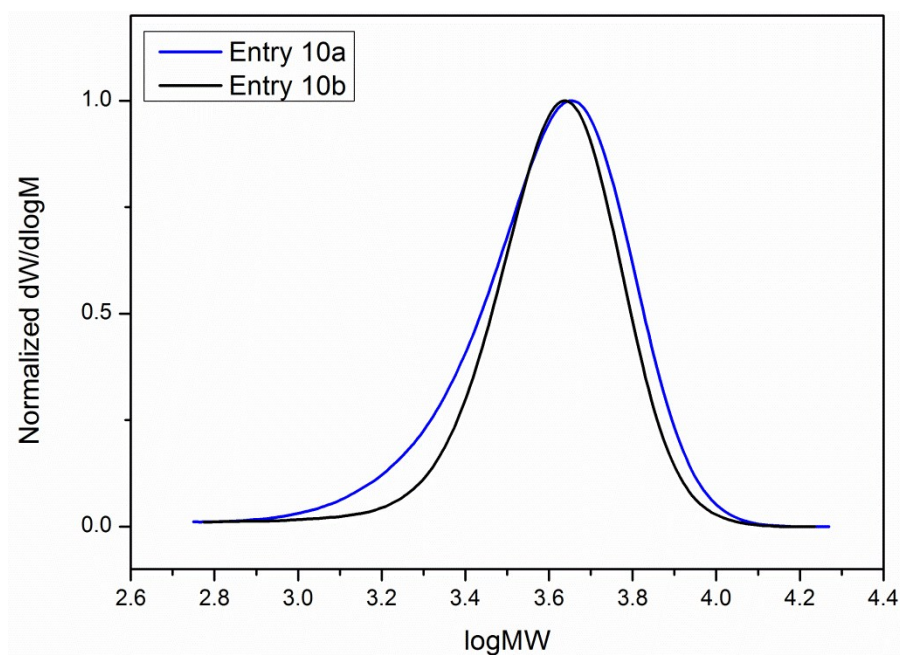

**Fig. S19** Molecular weight distributions for the polymerization at 0 °C of pNIPAm in carbonated water adjusted to pH 8 using NaHCO<sub>3</sub>; [NIPAm] : [I] : [Cu<sup>(II)</sup>Br] : [Me<sub>6</sub>TREN] = [20] : [1] : [0.4] : [0.4].

**UV-Vis comparison of the Cu<sup>(II)</sup>Br<sub>2</sub>/Me<sub>6</sub>TREN complex in carbonated and HPLC grade water**

| Code                                                        | pH   |
|-------------------------------------------------------------|------|
| <b>Cu<sup>(II)</sup>/L in pure water <sup>a</sup></b>       | 8.89 |
| <b>Cu<sup>(II)</sup>/L in carbonated water <sup>a</sup></b> | 5.45 |
| <b>Cu<sup>(II)</sup>/L in acidified water <sup>a</sup></b>  | 5.55 |

<sup>a</sup> 1 mg/mL Cu(II)Br<sub>2</sub> , 2 eq. Me<sub>6</sub>TREN

**Table S14** pH measurements for the solutions analyzed by UV-Vis spectroscopy.

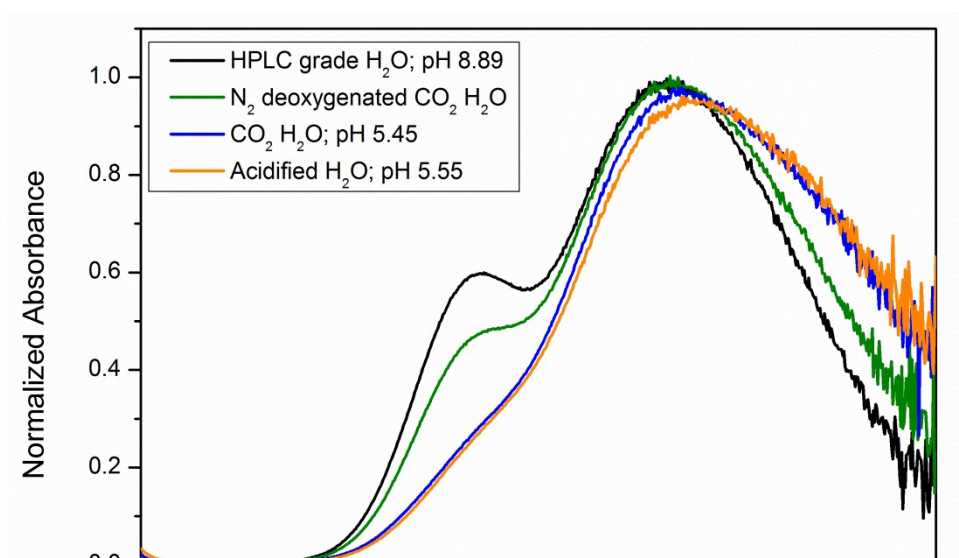

**Fig. S20** UV-Vis spectra for  $[\text{Cu}^{\text{II}}\text{Br}_2/\text{Me}_6\text{TREN}]$  in HPLC grade water (black),  $\text{N}_2$  deoxygenated carbonated water (green), carbonated water (blue) and acidified HPLC grade water (orange).

**Procedure for the polymerization and depolymerization of NIPAm in the presence of  $\text{Me}_6\text{TREN}$  with addition of HCl *prior* to depolymerization**

$\text{Me}_6\text{TREN}$  (23.6  $\mu\text{L}$ , 0.4 eq.) was added to a 14 mL glass vial containing Highland Spring carbonated water (3 mL), sealed with a rubber septum and stirred at 250 rpm for 1 minute. The glass vial was then placed into an ice/water bath to regulate the temperature and suppress the rate of hydrolysis.  $\text{Cu}^{\text{II}}\text{Br}$  (12.7 mg, 0.4 eq.) was rapidly added to the ligand-water mix and the vial was re-sealed. Upon addition of  $\text{Cu}^{\text{II}}\text{Br}$  to the ligand-water mix, a coloured solution formed and red/brown  $\text{Cu}^{\text{II}}$  particles were visible. The solution was allowed to stir and disproportionate whilst 3-dihydroxypropyl 2-bromo-2-methylpropanoate (53.3 mg, 1.0 eq.) and NIPAm (500 mg, 20 eq.) were dissolved in Highland Spring carbonated water (2 mL), sealed with a rubber septum, and stirred at 250 rpm for 10 minutes. At the end of this period the initiator-monomer solution was transferred *via* a syringe and needle into the glass vial containing the disproportionated ligand and  $\text{Cu}^{\text{II}}\text{Br}$ . After 10 minutes, 100  $\mu\text{L}$  concentrated hydrochloric acid (HCl) (37 %, Sigma Aldrich) was added to the reaction mix. Samples for NMR and GPC were taken using a syringe, frozen in liquid nitrogen, thawed, and diluted in the appropriate solvents.

| Code         | Targeted<br>DP | Time<br>(minutes) | Conversion<br>(%) | Depolymerization<br>(%) | $M_{n,th}$<br>$g\ mol^{-1}$ | $M_{n,GPC}$<br>$g\ mol^{-1}$ | $\bar{D}_m$ |
|--------------|----------------|-------------------|-------------------|-------------------------|-----------------------------|------------------------------|-------------|
| Entry<br>11a | 20             | 10                | 100               | -                       | 2500                        | 3900                         | 1.22        |
| Entry<br>11b | 20             | 60                | 46                | 54                      | 1200                        | 2600                         | 1.17        |

**Table S15**  $^1H$  NMR and SEC results for the polymerization and depolymerization of NIPAm with the addition of HCl *prior* to depolymerization.

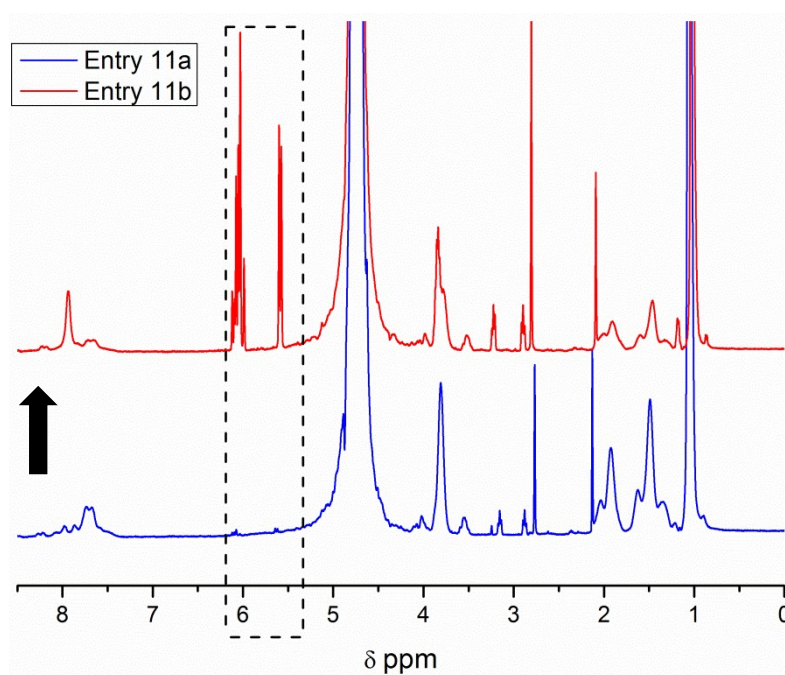

**Fig. S21**  $^1H$  NMR spectra ( $D_2O$ ) for the polymerization (entry 11a, blue) and depolymerization (entry 11b, red) of pNIPAm in carbonated water at  $0\ ^\circ C$  with the addition of HCl *prior* to depolymerization;  $[NIPAm] : [I] : [Cu^{0}Br] : [Me_6TREN] = [20] : [1] : [0.4] : [0.4]$ .

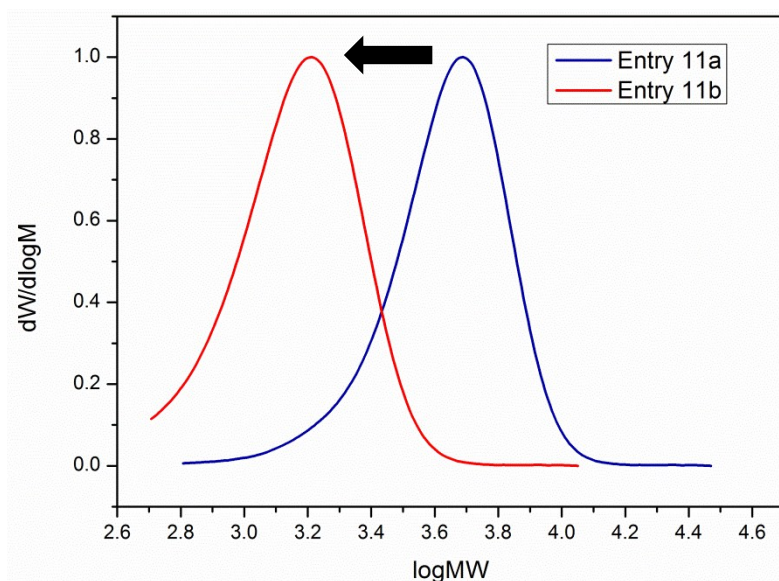

**Fig. S22** Molecular weight distributions for the polymerization (entry 11a, blue) and depolymerization (entry 11b, red) of pNIPAm in carbonated water at 0 °C with the addition of HCl *prior* to depolymerization; [NIPAm] : [I] : [Cu<sup>(I)</sup>Br] : [Me<sub>6</sub>TREN] = [20] : [1] : [0.4] : [0.4].

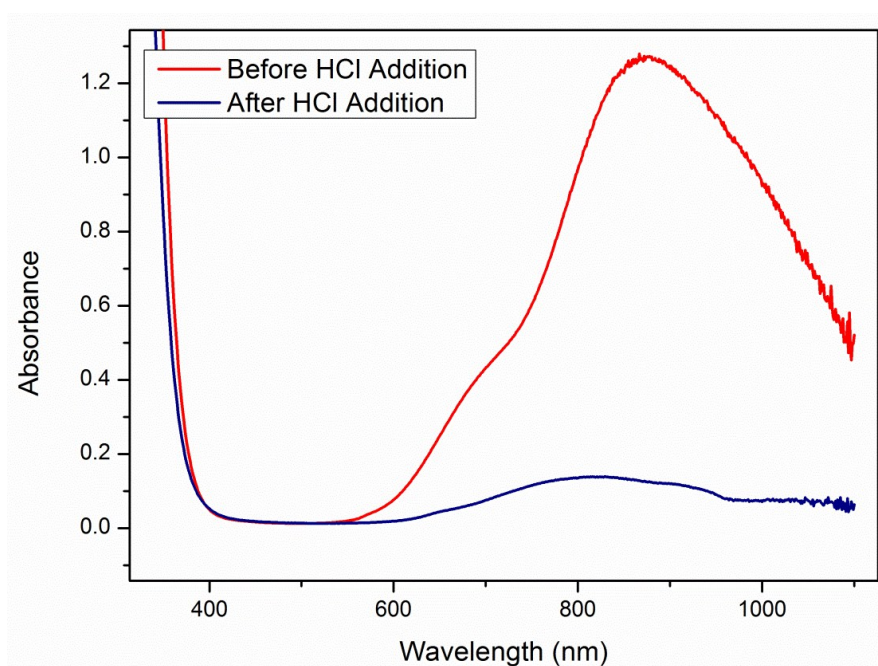

**Fig. S23** UV-Vis chromatogram for the polymerization and depolymerization of NIPAm with the addition of HCl *prior* to depolymerization.

**Typical procedure for the aqueous Cu-mediated RDRP of DP = 20 NIPAm in the presence of PMDETA**

To a Schlenk tube equipped with a magnetic stirring bar, HPLC grade water (3 mL) and PMDETA (18.5  $\mu$ L, 0.4 eq.) were added and purged of oxygen *via* nitrogen ( $N_2$ ) bubbling for 2 minutes. The mixture was placed in a ice/water bath to regulate the temperature (0  $^{\circ}$ C) after which  $Cu^{(I)}Br$  (12.7 mg, 0.4 eq.) was added under an  $N_2$  atmosphere. Upon addition of  $Cu^{(I)}Br$  to the ligand-water mix, a coloured solution formed and red/brown  $Cu^{(0)}$  particles were visible. The resulting solution was allowed to stir and disproportionate whilst 3-dihydroxypropyl 2-bromo-2-methylpropanoate (53.3 mg, 1eq.) and NIPAm (0.5 g, 20 eq.) were dissolved in water (2 mL) and bubbled with nitrogen for 15 minutes. At the end of the deoxygenation period the initiator-monomer solution was transferred *via* a nitrogen purged syringe and needle into the Schlenk tube. Samples for NMR and GPC were taken using a nitrogen purged syringe, filtered through an alumina column, and diluted in the appropriate solvents.

| Code      | Targeted<br>DP | Time<br>(minutes) | Conversion<br>(%) | $M_{n,th}$<br>$g\ mol^{-1}$ | $M_{n,GPC}$<br>$g\ mol^{-1}$ | $\bar{D}_m$ |
|-----------|----------------|-------------------|-------------------|-----------------------------|------------------------------|-------------|
| Entry 12a | 20             | 30                | 96                | 2400                        | 2000                         | 1.74        |
| Entry 12b | 20             | 60                | 100               | -                           | -                            | -           |

**Table S16**  $^1H$  NMR and SEC results for the polymerization of NIPAm in HPLC grade water utilizing PMDETA as the ligand.



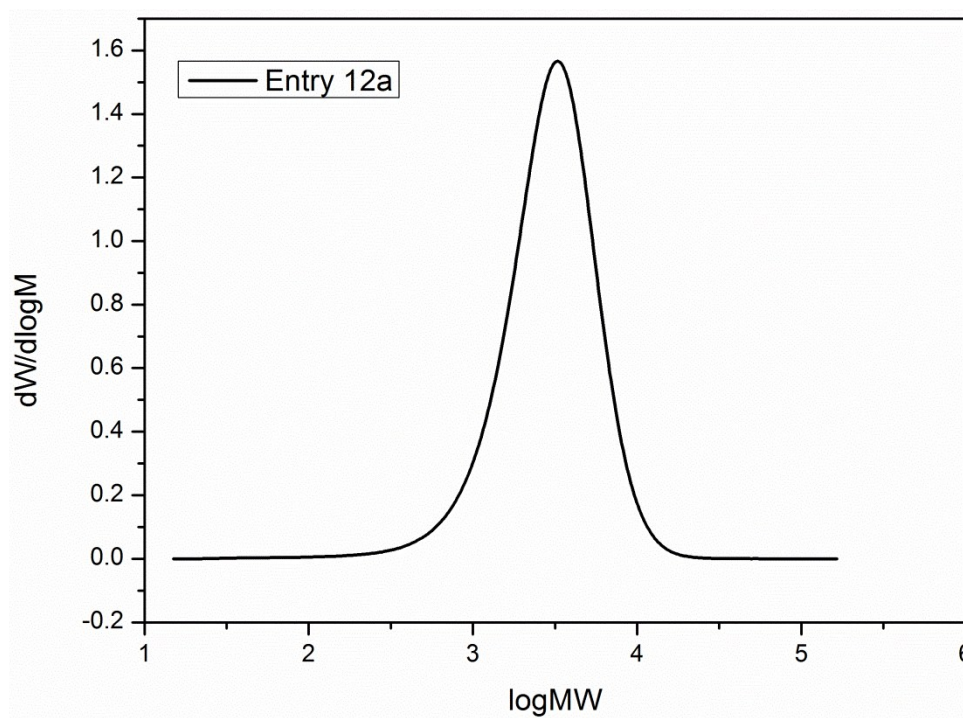

**Fig. S24** Molecular weight distributions for the polymerization of NIPAm in HPLC grade water employing PMDETA as the ligand (entry 12a); [NIPAm] : [I] : [Cu<sup>0</sup>Br] : [PMDETA] = [20] : [1] : [0.4] : [0.4].

**Typical procedure for the polymerization of DP = 20 NIPAm in the presence of PMDETA and carbonated water**

PMDETA (18.5  $\mu$ L, 0.4 eq.) was added to a 14 mL glass vial containing Highland Spring carbonated water (3 mL), sealed with a rubber septum and stirred at 250 rpm for 1 minute. The glass vial was then placed into an ice/water bath to regulate the temperature and suppress the rate of hydrolysis. Cu<sup>0</sup>Br (12.7 mg, 0.4 eq.) was rapidly added to the ligand-water mix and the vial was re-sealed. Upon addition of Cu<sup>0</sup>Br to the ligand-water mix, a coloured solution formed and red/brown Cu<sup>0</sup> particles were visible. The solution was allowed to stir and disproportionate whilst 3-dihydroxypropyl 2-bromo-2-

methylpropanoate (53.3 mg, 1.0 eq.) and NIPAm (500 mg, 20.0 eq.) were dissolved in Highland Spring carbonated water (2 mL), sealed with a rubber septum, and stirred at 250 rpm for 10 minutes. At the end of this period the initiator-monomer solution was transferred *via* a syringe and needle into the glass vial containing the disproportionated ligand and Cu<sup>(0)</sup>Br. Samples for NMR and GPC were taken using a syringe, frozen in liquid nitrogen, thawed, and diluted in the appropriate solvents.

| Code      | Targeted<br>DP | Time<br>(minutes) | Conversion<br>(%) | Depolymerization<br>(%) | M <sub>n,th</sub><br>g mol <sup>-1</sup> | M <sub>n,GPC</sub><br>g mol <sup>-1</sup> | Đ <sub>m</sub> |
|-----------|----------------|-------------------|-------------------|-------------------------|------------------------------------------|-------------------------------------------|----------------|
| Entry 13a | 20             | 10                | 88                | -                       | 2200                                     | -                                         | -              |
| Entry 13b | 20             | 60                | 82                | -                       | 2100                                     | 6100                                      | 1.62           |

**Table S17** <sup>1</sup>H NMR and SEC results for the polymerization of NIPAm in carbonated water utilizing PMDETA as the ligand.

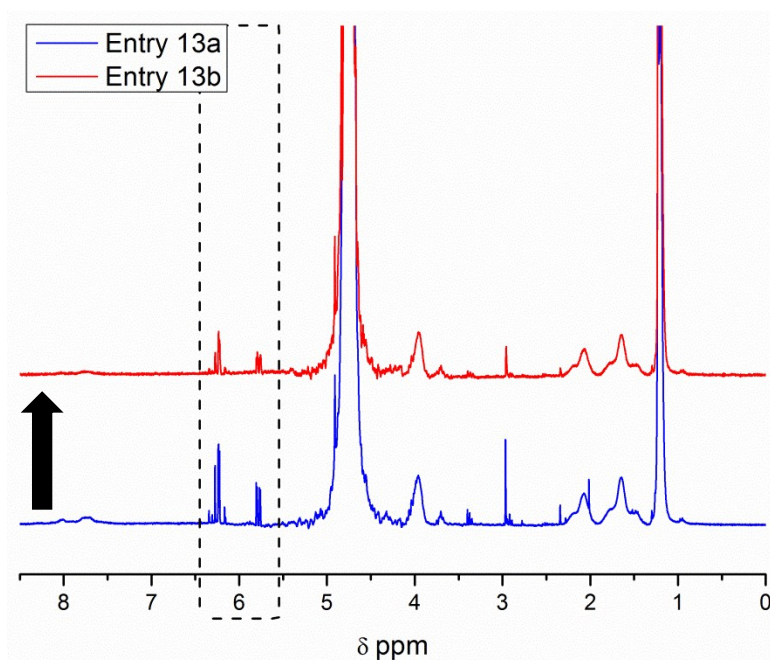

**Fig. S25** <sup>1</sup>H NMR spectra (D<sub>2</sub>O) for the polymerization of pNIPAm in carbonated water at 0 °C; [NIPAm] : [I] : [Cu<sup>(0)</sup>Br] : [PMDETA] = [20] : [1] : [0.4] : [0.4].



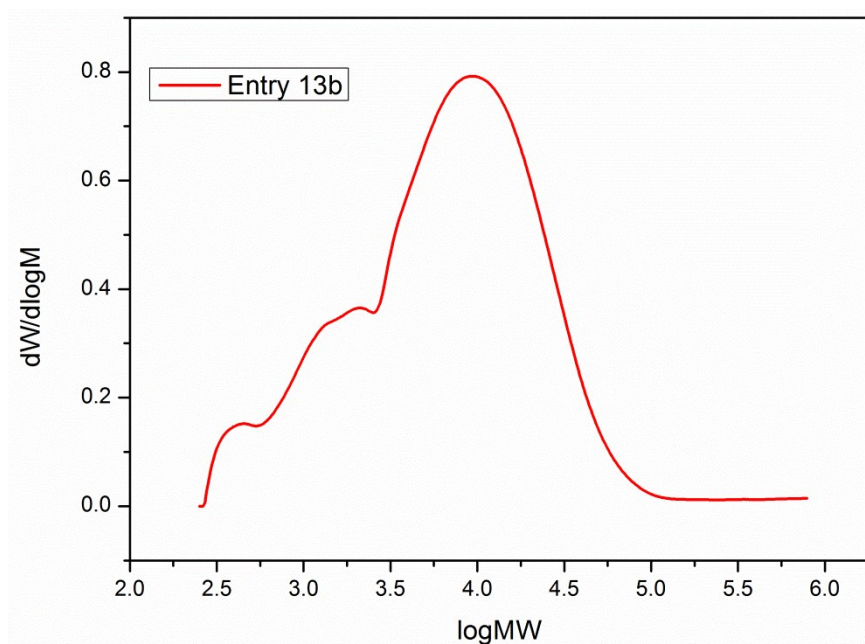

**Fig. S26** Molecular weight distributions for the polymerization of pNIPAm in carbonated water at 0 °C; [NIPAm] : [I] : [Cu<sup>(I)</sup>Br] : [PMDETA] = [20] : [1] : [0.4] : [0.4].

#### **Typical procedure for the polymerization and depolymerization of high molecular weight NIPAm in the presence of Me<sub>6</sub>TREN**

Me<sub>6</sub>TREN was added to a 14 mL glass vial containing Highland Spring carbonated water (3 mL), sealed with a rubber septum and stirred at 250 rpm for 1 minute. The glass vial was then placed into an ice/water bath to regulate the temperature and suppress the rate of hydrolysis. Cu<sup>(I)</sup>Br was rapidly added to the ligand-water mix and the vial was re-sealed. Upon addition of Cu<sup>(I)</sup>Br to the ligand-water mix, a coloured solution formed and red/brown Cu<sup>(0)</sup> particles were visible. The solution was allowed to stir and disproportionate whilst 3-dihydroxypropyl 2-bromo-2-methylpropanoate and NIPAm were dissolved in Highland Spring carbonated water (2 mL), sealed with a rubber septum, and stirred at 250 rpm for 10 minutes. At the end of this period the initiator-monomer solution was transferred *via* a syringe and needle into the glass vial containing the disproportionated ligand and Cu<sup>(I)</sup>Br. Samples for NMR and GPC were taken using a syringe, frozen in liquid nitrogen, thawed, and diluted in the appropriate solvents.

The amounts and equivalents of the reagents for the polymerizations are provided in Table S18.

| Code        | Targeted | Monomer | Initiator | Initiator | Ligand | Ligand     | Cu <sup>0</sup> Br | Cu <sup>0</sup> Br |
|-------------|----------|---------|-----------|-----------|--------|------------|--------------------|--------------------|
|             | DP       | (mg)    | (eq.)     | (mg)      | (eq.)  | ( $\mu$ L) | (eq.)              | (mg)               |
| Entry<br>14 | 120      | 500.0   | 1.0       | 8.9       | 0.4    | 3.9        | 0.4                | 2.1                |
| Entry<br>15 | 120      | 500.0   | 1.0       | 8.9       | 2.4    | 23.6       | 2.4                | 12.7               |
| Entry<br>16 | 20       | 500.0   | 1.0       | 53.3      | 2.4    | 141.7      | 2.4                | 76.0               |

**Table S18** Conditions used to synthesize pNIPAm in carbonated water to different degrees of polymerization (DP).

| Code         | Targeted | Time      | Conversion | Depolymerization | M <sub>n,th</sub>   | M <sub>n,GPC</sub>  | D <sub>m</sub> |
|--------------|----------|-----------|------------|------------------|---------------------|---------------------|----------------|
|              | DP       | (minutes) | (%)        | (%)              | g mol <sup>-1</sup> | g mol <sup>-1</sup> |                |
| Entry<br>14a | 120      | 10        | 0          | -                | -                   | -                   | -              |
| Entry<br>14b | 120      | 60        | 0          | -                | -                   | -                   | -              |
| Entry<br>15a | 120      | 10        | 100        | -                | 13800               | 20600               | 1.18           |
| Entry<br>15b | 120      | 60        | 57         | 43               | 7900                | 12400               | 1.11           |
| Entry<br>16a | 20       | 10        | 100        | -                | 2500                | 9300                | 1.16           |
| Entry<br>16b | 20       | 60        | 100        | -                | 2500                | 9200                | 1.14           |

**Table S19**  $^1\text{H}$  NMR and SEC results for the polymerization (a) and depolymerization (b) of pNIPAm to different degrees of polymerization (DP) in the presence of varying amounts of  $\text{Cu}^{\text{I}}\text{Br}/\text{Me}_6\text{TREN}$ .

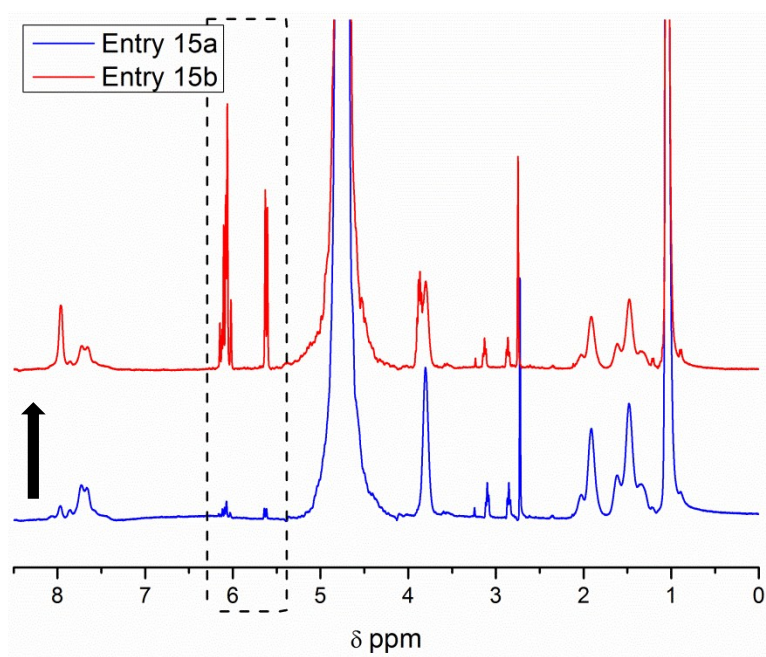

**Fig. S27**  $^1\text{H}$  NMR spectra ( $\text{D}_2\text{O}$ ) for the polymerization (entry 15a, blue) and depolymerization (entry 15b, red) of pNIPAm in carbonated water at  $0\text{ }^\circ\text{C}$ ;  $[\text{NIPAm}] : [\text{I}] : [\text{Cu}^{\text{I}}\text{Br}] : [\text{Me}_6\text{TREN}] = [120] : [1] : [2.4] : [2.4]$ .

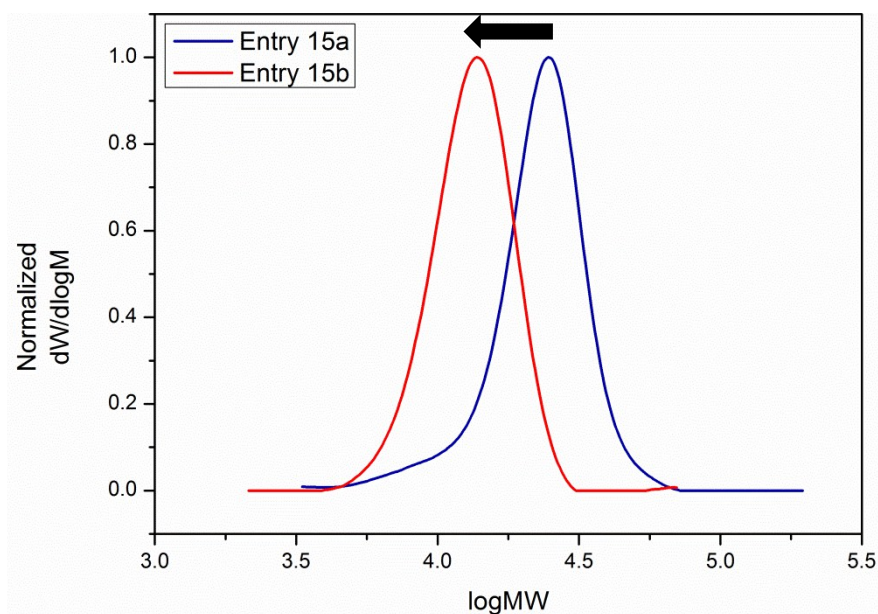

**Fig. S28** Molecular weight distributions for the polymerization (entry 15a, blue) and depolymerization (entry 15b, red) of pNIPAm in carbonated water at 0 °C; [NIPAm] : [I] : [Cu<sup>I</sup>Br] : [Me<sub>6</sub>TREN] = [120] : [1] : [2.4] : [2.4].

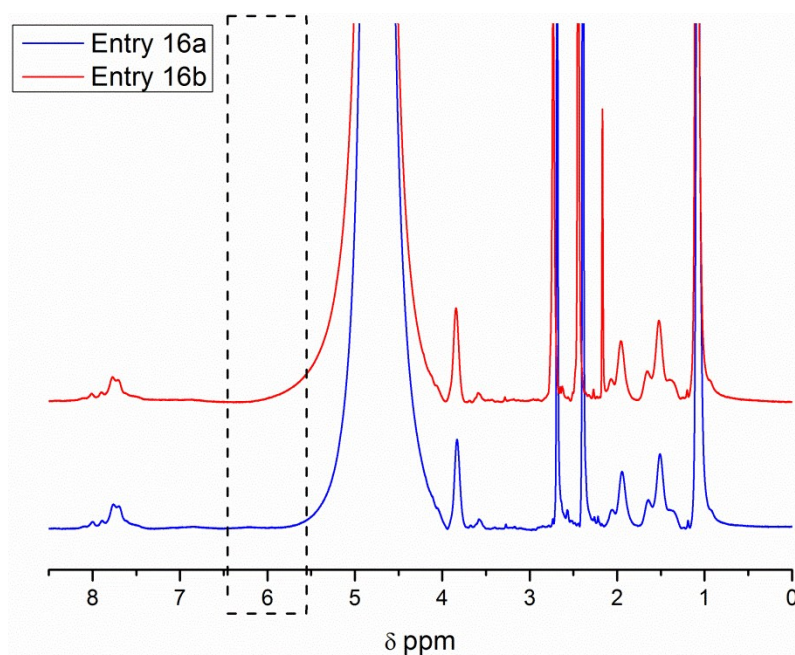

**Fig. S29** <sup>1</sup>H NMR spectra (D<sub>2</sub>O) for the polymerization (entry 16a, blue) and depolymerization (entry 16b, red) of pNIPAm in carbonated water at 0 °C; [NIPAm] : [I] : [Cu<sup>I</sup>Br] : [Me<sub>6</sub>TREN] = [20] : [1] : [2.4] : [2.4].

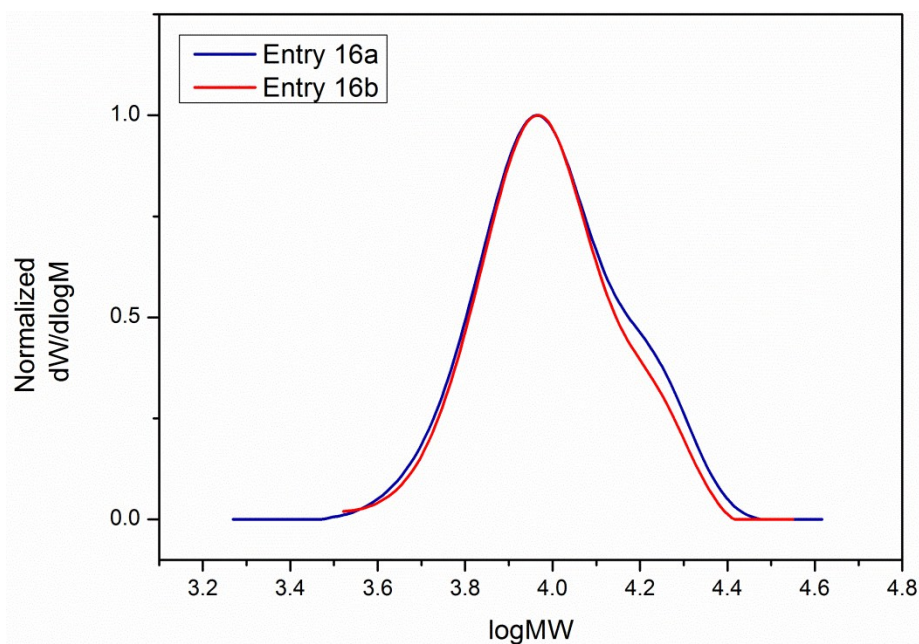

**Fig. S30** Molecular weight distributions for the polymerization (entry 16a, blue) and depolymerization (entry 16b, red) of pNIPAm in carbonated water at 0 °C; [NIPAm] : [I] : [Cu<sup>(I)</sup>Br] : [Me<sub>6</sub>TREN] = [20] : [1] : [2.4] : [2.4].

#### **Typical procedure for the polymerization and depolymerization of other water soluble monomers in the presence of Me<sub>6</sub>TREN**

Me<sub>6</sub>TREN was added to a 14 mL glass vial containing Highland Spring carbonated water (3 mL), sealed with a rubber septum and stirred at 250 rpm for 1 minute. The glass vial was then placed into an ice/water bath to regulate the temperature and suppress the rate of hydrolysis. Cu<sup>(I)</sup>Br was rapidly added to the ligand-water mix and the vial was re-sealed. Upon addition of Cu<sup>(I)</sup>Br to the ligand-water mix, a coloured solution formed and red/brown Cu<sup>(0)</sup> particles were visible. The solution was allowed to stir and disproportionate whilst 3-dihydroxypropyl 2-bromo-2-methylpropanoate and uninhibited monomer were dissolved in Highland Spring carbonated water (1 mL), sealed with a rubber septum, and stirred at 250 rpm for 10 minutes. At the end of this period the initiator-monomer solution was transferred *via* a syringe and needle into the glass vial containing the disproportionated ligand and Cu<sup>(I)</sup>Br. Samples for NMR and GPC were taken using a syringe, frozen in liquid nitrogen, thawed, and diluted in the appropriate solvents.



The amounts and equivalents of the reagents for the polymerizations are provided in Table S20.

| Code     | Targeted<br>DP | Monomer<br>(mg) | Initiator<br>(eq.) | Initiator<br>(mg) | Ligand<br>(eq.) | Ligand<br>( $\mu$ L) | Cu <sup>0</sup> Br<br>(mg) | Cu <sup>0</sup> Br<br>(eq.) |
|----------|----------------|-----------------|--------------------|-------------------|-----------------|----------------------|----------------------------|-----------------------------|
| Entry 17 | 20             | 500.0           | 1.0                | 52.4              | 0.4             | 23.2                 | 0.4                        | 12.5                        |
| Entry 18 | 20             | 500.0           | 1.0                | 51.9              | 0.4             | 23.0                 | 0.4                        | 12.3                        |

**Table S20** Conditions used to synthesize DP = 20 pHEAm (entry 17) and pHEA (entry 18) in carbonated water.

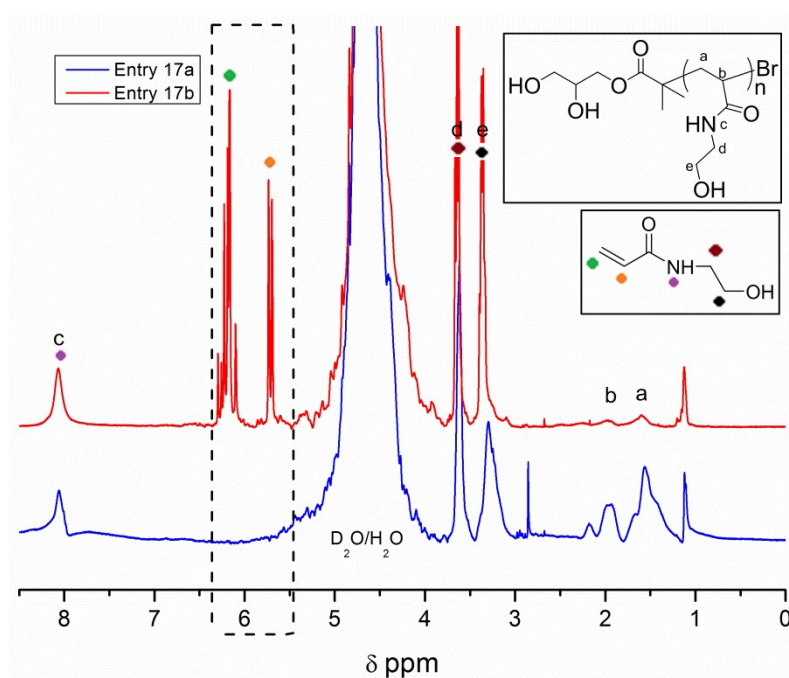

**Fig. S31** <sup>1</sup>H NMR spectra (D<sub>2</sub>O) for the polymerization (entry 17a, blue) and depolymerization (entry 17b, red) of pHEAm in carbonated water at 0 °C; [HEAm] : [I] : [Cu<sup>0</sup>Br] : [Me<sub>6</sub>TREN] = [20] : [1] : [0.4] : [0.4].

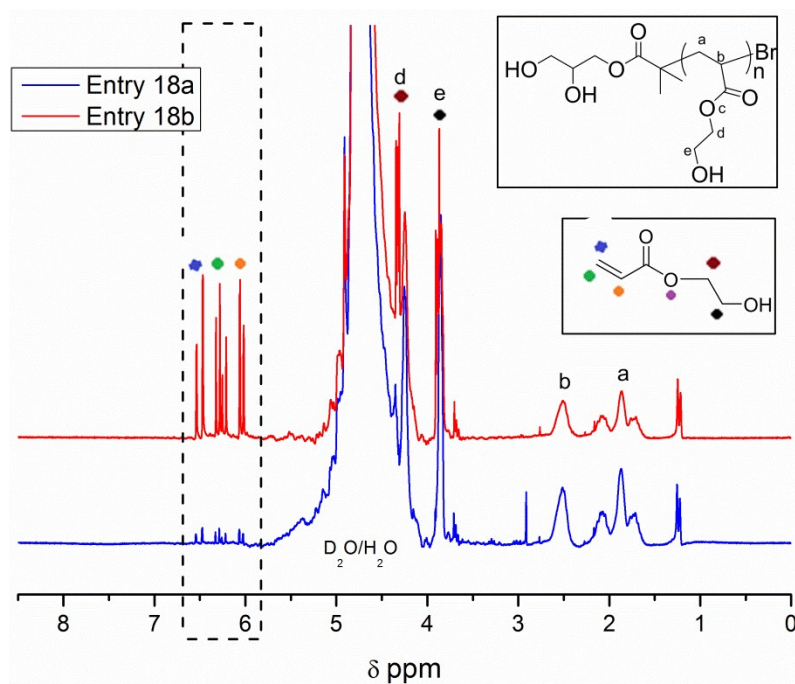

**Fig. S32**  $^1\text{H}$  NMR spectra ( $\text{D}_2\text{O}$ ) for the polymerization (entry 18a, blue) and depolymerization (entry 18b, red) of pHEA in carbonated water at  $0\text{ }^\circ\text{C}$ ;  $[\text{HEA}] : [\text{I}] : [\text{Cu}^{\text{I}}\text{Br}] : [\text{Me}_6\text{TREN}] = [20] : [1] : [0.4] : [0.4]$ .

## References

1. S. Perrier, S. P. Armes, X. S. Wang, F. Malet and D. M. Haddleton, *J. Polym. Sci. Part A: Polym. Chem.*, 2001, **39**, 1696-1707.
2. M. Ciampolini and N. Nardi, *Inorg. Chem.*, 1966, **5**, 41-44.
3. R. N. Keller, H. D. Wycoff and L. E. Marchi, in *Inorg. Synth.*, John Wiley & Sons, Inc., 2007, DOI: 10.1002/9780470132333.ch1, pp. 1-4.
